1                   **A Proximity Biotinylation Assay with a Host Protein Bait Reveals Multiple Factors**  
2                                   **Modulating Enterovirus Replication**

3

4                   Seyedehmahsa Moghimi<sup>1</sup>, Ekaterina Viktorova<sup>1</sup>, Samuel Gabaglio<sup>1</sup>, Anna Zimina<sup>1</sup>, Bogdan  
5                                   Budnik<sup>2,3</sup>, Bridge G. Wynn<sup>4</sup>, Elizabeth Sztul<sup>4</sup> and George A. Belov<sup>1,5</sup>

1. Department of Veterinary Medicine and Virginia-Maryland College of Veterinary Medicine,  
University of Maryland, College Park, Maryland, USA

2. Mass Spectrometry and Proteomics Resource Laboratory (MSPRL), FAS Division of Science,  
Harvard University, Cambridge, Massachusetts, USA,

3. Current address: Wyss Institute, Harvard University, Boston, Massachusetts, USA

4. Department of Cell, Developmental and Integrative Biology, University of Alabama at  
Birmingham; Birmingham, Alabama, USA

<sup>4</sup>Corresponding author: e-mail: [gbelov@umd.edu](mailto:gbelov@umd.edu);

phone:301-314-1259

6

7 As ultimate parasites, viruses depend on host factors for every step of their life cycle. On the  
8 other hand, cells evolved multiple mechanisms of detecting and interfering with viral replication.  
9 Yet, our understanding of the complex ensembles of pro- and anti-viral factors is very limited in  
10 virtually every virus-cell system. Here we investigated the proteins recruited to the replication  
11 organelles of poliovirus, a representative of the genus *Enterovirus* of the *Picornaviridae* family.  
12 We took advantage of a strict dependence of enterovirus replication on a host protein GBF1,  
13 and established a stable cell line expressing a truncated GBF1 fused to APEX2 peroxidase that  
14 effectively supported viral replication upon inhibition of the endogenous GBF1. This construct  
15 biotinylated multiple host and viral proteins on the replication organelles. Among the viral  
16 proteins, the polyprotein cleavage intermediates were overrepresented, arguing that the GBF1  
17 environment is linked to the viral polyprotein processing. The proteomics characterization of  
18 biotinylated host proteins identified those previously associated with the enterovirus replication,  
19 as well as more than 200 new factors recruited to the replication organelles. RNA metabolism  
20 proteins many of which normally localize in the nucleus constituted the largest group,  
21 underscoring the massive release of nuclear factors in the cytoplasm of infected cells and their  
22 involvement in the viral replication. Analysis of several newly identified proteins revealed both  
23 pro- and anti-viral factors, including a novel component of infection-induced stress granules.  
24 Depletion of these proteins similarly affected the replication of diverse enteroviruses indicating  
25 broad conservation of the replication mechanisms. Thus, our data significantly increase the  
26 knowledge about the organization of enterovirus replication organelles and may provide new  
27 targets for anti-viral interventions.

28

29 Enterovirus infections are associated with numerous life-threatening and/or economically  
30 important diseases ranging from the common cold to fatal encephalitis. Among multiple  
31 pathogenic enteroviruses, licensed vaccines are available only against poliovirus and  
32 Enterovirus A71, and there are no drugs approved by the FDA to control enterovirus infections  
33 (1-5). This appalling scarcity of effective anti-enterovirus measures visibly reflects the  
34 inadequate understanding of the molecular mechanisms underlying the development of infection  
35 of this important group of viruses.

36 The *Enterovirus* genus belongs to the family *Picornaviridae* encompassing small positive-strand  
37 RNA viruses with non-enveloped icosahedral capsids infecting vertebrate hosts. Poliovirus is  
38 the best-studied enterovirus, its single genome RNA of about 7500 nucleotides is  
39 polyadenylated on the 3'-end and has a small protein Vpg covalently attached to the 5'-end.  
40 The 5'-end long non-translated region of the genome RNA contains an internal ribosome entry  
41 site (IRES), and both 5' and 3' non-translated regions, as well as the coding part of the genome,  
42 contain cis-acting elements important for the RNA replication (6). The viral RNA is translated  
43 into a single polyprotein of about 200KDa which is processed by three viral proteases into three  
44 capsid and ten replication proteins, including stable intermediate products of the polyprotein  
45 processing (7-10). Upon accumulation of the replication proteins, they form a replication  
46 complex where most of the viral proteins are assembled *in cis*, i. e. processed from the same  
47 polyprotein precursor, and likely initiate replication of the same RNA that served as an mRNA  
48 for protein synthesis (11-14). The newly synthesized genomes can enter subsequent  
49 translation-replication cycles or be packaged into new viral particles.

50 The small genome size and consequently a limited repertoire of viral proteins implies that  
51 multiple host factors should support the replication process. Over the years, many host proteins  
52 that are required for, or facilitate the development of enterovirus infection have been identified  
53 (many of them are reviewed in (15-17), but the full catalog of all the cellular proteins that have  
54 been implicated in the enterovirus life cycle is yet to be compiled). The two major groups that  
55 emerged from these studies are the host nucleic acid metabolism proteins that modulate  
56 translation and/or replication of the viral RNA, and membrane metabolism proteins that are  
57 hijacked to support the structural and functional development of the viral replication organelles,  
58 specialized membranous platforms harboring the viral replication complexes. Currently, neither  
59 the stoichiometry of the viral proteins nor the full spectrum of the cellular factors required for the  
60 activity of the enterovirus replication complexes are known.

61 Multiple cellular factors can directly interact with specific structural elements of viral RNA and  
62 affect its stability, translation, and replication efficiency. Importantly, while the enterovirus life  
63 cycle takes place exclusively in the cytoplasm, many of such proteins are normally restricted to  
64 the cellular nucleus. Enteroviruses gain access to the nuclear proteins through the action of a  
65 protease 2A which specifically cleaves several nucleoporins resulting in the inactivation of  
66 organized nucleo-cytoplasmic trafficking and release of the nuclear proteins into the cytoplasm  
67 (18-21). A few well-studied examples include a DNA repair component tyrosyl-DNA  
68 phosphodiesterase 2 (TDP2) which removes the Vpg from the 5' end of the viral RNA  
69 associated with polysomes (22, 23). Nuclear mRNA processing factors polypyrimidine tract  
70 binding protein 1 (PTB1) and poly(rC) binding proteins 1 and 2 (PCBP1 and PCBP2) interact  
71 with the IRES elements of different picornaviruses, including enteroviruses, and stimulate  
72 translation and/or replication of the viral RNAs (22, 24, 25). Heterogeneous nuclear  
73 ribonucleoprotein C (HNRNPC) is required for optimal functioning of the poliovirus RNA  
74 replication complex (26). Over the years, several other host nuclear proteins have been  
75 identified that interact with specific structural elements of the RNAs of enteroviruses and other  
76 picornaviruses, however, the full extent of the effects exerted by the complex mixture of the  
77 nuclear RNA-binding factors that are translocated to the cytoplasm upon infection is still far from  
78 understood (27, 28). Interestingly, the accumulating evidence demonstrates that none of such  
79 RNA binding and/or processing proteins is absolutely required for the infection, suggesting a  
80 significant redundancy of the host protein functions in supporting viral RNA  
81 translation/replication cycle (22, 23, 29, 30). Rather, the cumulative effect of multiple host  
82 proteins on the viral RNA stability, translation, and replication efficiency is likely cell type-  
83 dependent, contributing to the determination of the viral tropism in the host (31, 32).

84 Viral RNA replication and, likely, translation, especially during the later stages of infection, are  
85 associated with replication organelles. These structures feature unique membrane and protein  
86 composition, and their establishment and expansion depend on the virus-induced  
87 reconfiguration of the cellular lipid and membrane synthesis and trafficking pathways.  
88 Accordingly, several key host proteins hijacked by enteroviruses have been identified that are  
89 responsible for the structural development and the acquisition of a specific replication-conductive  
90 biochemical signature of the replication organelles. CTP-phosphocholine-cytidyl transferase  
91 alpha (CCT $\alpha$ ), the rate-limiting enzyme in the phosphatidylcholine synthesis pathway, lipid  
92 droplet-associated lipases adipocyte triglyceride lipase (ATGL) and hormone-sensitive lipase  
93 (HSL), as well as several long-chain acyl-CoA synthetases (ACSLCs), are implicated in the  
94 activation of infection-specific phospholipid synthesis that provides the bulk of membrane

95 material for the expansion of the replication organelles (33-35). Recruitment of GBF1, a guanine  
96 nucleotide exchange factor for small GTPases Arf (ArfGEF), results in a massive association of  
97 Arfs with the replication organelles. Phosphatidylinositol 4 kinase III beta (PI4KIII $\beta$ ) and  
98 oxysterol binding protein (OSBP) together with several other factors mediate the enrichment of  
99 the replication organelles in phosphatidylinositol 4 phosphate (PI4P) and cholesterol. Inhibition  
100 of GBF1, PI4KIII $\beta$  or OSBP activities severely restricts the replication of diverse enteroviruses  
101 (36-50). By the end of the enterovirus replication cycle, the replication organelles may occupy  
102 most of the cellular volume (51, 52). Thus, these membranes should be significantly enriched in  
103 the factors that support the translation and/or replication of the viral RNA, but also likely in those  
104 that may possess a direct anti-viral activity.

105 Here we took advantage of a strict dependence of enterovirus replication on a cellular protein  
106 GBF1 to perform a proteomics characterization of the replication organelles. GBF1 is recruited  
107 to the replication organelles through direct interaction with the enterovirus non-structural protein  
108 3A, and the ArfGEF activity of GBF1 is required to support the viral RNA replication (46-48).  
109 Thus, GBF1 is likely localized on the replication organelles close to the active replication  
110 complexes. GBF1 is a large multi-domain protein normally engaged in multiple protein-protein  
111 and protein-membrane interactions (reviewed in (53)). We previously demonstrated that the C-  
112 terminal part of GBF1 is dispensable for enterovirus replication (54, 55). To reduce the  
113 background of the proteins that are not likely to be important for viral replication, we used such a  
114 C-terminally truncated GBF1 to generate a fusion with the APEX2 peroxidase. This peroxidase  
115 in the presence of H<sub>2</sub>O<sub>2</sub> and biotin-phenol generates short-lived active biotin-phenoxy radicals  
116 that covalently attach to the electron-rich amino-acids of nearby proteins. The APEX2-based  
117 proximity biotinylation assay has been successfully used for the characterization of proteomes  
118 of different compartments of eukaryotic cells (56-58). In non-infected cells, the truncated  
119 APEX2-GBF1 construct diffusely localized in the cytoplasm in non-infected cells, but was  
120 effectively recruited to the replication organelles and was fully functional in supporting poliovirus  
121 replication. Accordingly, the profile of the biotinylated proteins isolated from mock- and  
122 poliovirus-infected cells was significantly different. Among the biotinylated viral proteins, i.e.  
123 those localized close to GBF1, the intermediate products of polyprotein processing were  
124 significantly enriched, suggesting that either the GBF1 environment is associated with active  
125 polyprotein processing, or that those incomplete products of proteolysis may perform specific  
126 functions in the GBF1-enriched domains of the replication organelles. The largest group of host  
127 proteins identified in infected samples were those involved in RNA metabolism, many of which  
128 are normally localized in the nucleus, underscoring the massive relocalization of nuclear

129 proteins upon infection and their engagement in the replication process. Many of these proteins  
130 have been previously reported to be associated with the replication of diverse enteroviruses,  
131 validating our approach. Knock-down of expression of several of the most abundant proteins  
132 identified in our assay revealed both pro- and anti-viral factors, affecting translation/replication  
133 step of the viral RNA life cycle. Interestingly, one of the strongest negative effects on viral  
134 replication was observed upon the knock-down of expression of fructose-bisphosphate aldolase  
135 A (AldoA), a glycolytic enzyme important for the ATP biogenesis and the production of ribose-5-  
136 phosphate, necessary for *de novo* nucleotide synthesis. We observed similar effects of the  
137 depletion of the assayed proteins on the development of infection of poliovirus and Coxsackie  
138 virus B3, representatives of the Enterovirus C and B species, respectively, indicating a  
139 conservation of the enterovirus replication mechanisms.

140 Thus, our data significantly expand the repertoire of the known cellular proteins involved in the  
141 development of enterovirus infection and elucidate the complex composition of pro- and anti-  
142 viral factors associated with the replication organelles.

143

## 144 **Materials and methods**

145 **Cells and viruses.** HeLa and RD cells were maintained in DMEM high glucose modification  
146 supplemented with pyruvate and 10% FBS. Retrovirus packaging cell line GP2-293 was  
147 maintained in DMEM high glucose modification supplemented with 10% FBS. Cell viability was  
148 determined using either CellTiter-Glo kit (Promega) or XTT assay (Thermo Fisher) that detect  
149 the level of cellular ATP, or the activity of the mitochondrial respiratory chain enzymes,  
150 respectively, according to the manufacturers' recommendations. Poliovirus type I (Mahoney)  
151 and Coxsackie virus B3 (Nancy) were rescued using the plasmids pXpA and p53CB3/T7 coding  
152 for the full-length viral cDNAs under the control of a T7 promoter kindly provided by Dr. Raul  
153 Andino (University of California, San Francisco) and Prof. van Kuppeveld (University of Utrecht,  
154 the Netherlands), respectively. The viruses were propagated in HeLa cells, viral titers were  
155 determined by plaque or TCID<sub>50</sub> assays on RD cells grown on 6- or 96-well plates, respectively,  
156 using 10x dilutions of the virus preparations. TCID<sub>50</sub> titers were calculated using Kärber's  
157 formula (59).

158 **Plasmids.** APEX2 coding sequence (56) with the FLAG epitope at the N-terminus optimized for  
159 expression in human cells was synthesized by Invitrogen (GeneArt service). For the transient  
160 expression, the FLAG-APEX2 was fused in-frame upstream of the GBF1 truncated after HDS1

161 domain and containing a BFA-resistant Sec7 domain from ARNO (GARG-1060) in a  
162 mammalian expression vector pCI (Promega) generating a plasmid pCI-FLAG-APEX2-GARG-  
163 1060. For stable expression, the FLAG-APEX2-GARG-1060 insert was cloned into the retroviral  
164 vector plasmid pLNCX2 (Takara Bio). Cloning details are available upon request. Plasmid  
165 pEGFP-GARG-1060 coding for the truncated GBF1 with a BFA-resistant Sec7 domain under  
166 the control of a CMV promotor was described in (54). Plasmids pXpA-RenR and pRib-CB3-  
167 RLUC coding for cDNAs of polio and Coxsackie B3 replicons with Renilla luciferase substituting  
168 the capsid coding region P1 under the control of a T7 promotor were described in (60, 61).

169 **Establishment of a HeLa cell line stably expressing APEX2-GBF1 construct.** Retrovirus  
170 packaging cell line GP2-293 (Takara Bio) expressing Moloney murine leukemia virus gag and  
171 pol genes was co-transfected with pLNCX2 vector with the FLAG-APEX2-GARG1060 insert and  
172 a plasmid coding for the vesicular stomatitis virus envelope glycoprotein (Takara Bio) using  
173 Mirus 2020 DNA transfection reagent (Mirus). The infectious virions were harvested in the  
174 culture supernatant 48 h post-transfection. HeLa cells seeded into a 6-well plate were  
175 transduced with the freshly produced retrovirus virions in the complete growth medium  
176 supplemented with 10 µg/ml Polybrene (Millipore Sigma). The plate was centrifuged at 1,200g  
177 for 1 h at 32°C to enhance the transduction efficiency and kept at 37C for 18 h. The next day,  
178 the transduction medium was replaced with a fresh complete growth medium, and cells were  
179 incubated overnight. Forty-eight hours after the start of transduction, cells were transferred into  
180 a T-25 flask, and the drug-resistant colonies were selected with 300 µg/ml G418 (VWR Life  
181 Science) for two weeks. The resistant colonies were pooled, and the stable cell lines were  
182 maintained in the complete growth medium supplemented with 300 µg/ml G418. At this point,  
183 approximately 60% of the cells showed the expression of the transgene. For a clonal selection,  
184 the cells were seeded at a density of ~0.3 cell/well in a 96 well plate and the colonies  
185 established from the individual cells were screened for the transgene expression. A colony that  
186 showed >90% uniform pattern of a functional transgene expression as demonstrated by anti-  
187 FLAG staining, biotinylation reaction, and polio replicon replication in the presence of 2µg/ml of  
188 brefeldin A (Millipore Sigma) was expanded and used for the rest of the study.

189 **Antibodies.** *Cellular proteins:* Mouse monoclonal antibodies: anti-GBF1 (BD Biosciences  
190 (612116)), anti-EWSR1 (Novus Biologicals (NBP1-92686)), anti-AldoA (ProteinTech (67453-1-  
191 Ig)), anti-ACBD3 (Millipore Sigma (SAB1405255)), anti-β-actin antibodies conjugated with  
192 horseradish peroxidase (HRP) (Millipore Sigma (A3854)). Rabbit polyclonal antibodies: anti-

193 OSBP (ProteinTech (11096-1)), anti-PI4KIII $\beta$  (Millipore Sigma (06-578)), anti-ILF3-90 (Millipore  
194 Sigma (HPA001897)), anti-FLAG tag (Thermo Fisher (PA1-984B)).

195 *Viral antigens*: Mouse monoclonal anti-poliovirus VP3, 2B, 2C, and 3A, and rabbit polyclonal  
196 antibodies against poliovirus 3B were a gift from prof. Kurt Bienz (University of Bazel,  
197 Switzerland) and were partially described in (62-64). Rabbit polyclonal anti-poliovirus 3D  
198 antibodies were custom generated by Chemicon and were described in (35). Mouse monoclonal  
199 anti-dsRNA antibody J2 was from English & Scientific Consulting Kft.

200 Secondary Alexa dye fluorescent antibody and streptavidin conjugates were from Thermo  
201 Fisher, HRP secondary antibody conjugates were from Amersham or KPL.

202 **Biotinylation reaction.** Depending on the future analysis, HeLa cells stably expressing FLAG-  
203 APEX2-GARG1060 were seeded in either a 12-well plate with or without coverslips, a T-25, or a  
204 T-225 flask. The cells were infected (or mock-infected) with 10 PFU/cell of poliovirus, and  
205 incubated in the presence of 2  $\mu$ g/ml BFA. At 30 min before the indicated times post-infection,  
206 the incubation medium was replaced with pre-warmed DMEM with 500  $\mu$ M biotinyl tyramide  
207 (biotin-phenol) (Chemodex). For the biotinylation reaction, the medium was replaced with PBS  
208 containing 20 mM H<sub>2</sub>O<sub>2</sub> (Millipore Sigma) and incubated for three min at 37°C. Then the cells  
209 were washed three times with PBS and either immediately fixed with 4% formaldehyde  
210 (Electron Microscopy Sciences) in PBS for microscopy, or lysed in RIPA lysis buffer  
211 supplemented with a proteinase inhibitor cocktail (Millipore Sigma) followed by sonication. The  
212 sonicated RIPA lysates were used either directly for SDS-PAGE and western blotting, or for  
213 further purification of biotinylated proteins.

214 **Purification of biotinylated proteins.** The whole-cell lysates were mixed with the streptavidin  
215 magnetic beads (Pierce) equilibrated in RIPA buffer and incubated on a rotator for 1 h at room  
216 temperature. The beads were collected using a magnetic rack and washed three times with  
217 RIPA buffer. The bound proteins were eluted by boiling the beads in 40  $\mu$ L of 3X Laemmli  
218 sample buffer supplemented with 2 mM biotin and 20 mM dithiothreitol for 10 min. The beads  
219 were removed using a magnetic rack, and the eluates were kept at -80°C for further analysis.

220 **siRNAs.** The following sense siRNA sequences targeting the expression of human genes were  
221 used:

|       |                           |      |
|-------|---------------------------|------|
| AldoA | 5'-CCGAGAACACCGAGGAGAA-3' | (65) |
| EWSR1 | 5'-CUACUAGAUGCAGAGACCC-3' | (66) |



|          |                              |      |
|----------|------------------------------|------|
| HNRNPA0  | 5'-CAGACCAAGCGCUCCCGUU-3'    | (67) |
| HNRNPH2  | 5'-CAUGAGAGUACAUAUUGAA-3'    | (68) |
| HNRNPH3  | 5'-GACAGUACGACUUCGUGGA-3'    | (67) |
| HNRNPR   | 5'-GGAGUAUGGAGUAUGCUGU-3'    | (67) |
| HNRNPU   | 5'-AAAGACCACGAGAAGAUCAUG-3'  | (69) |
| ILF3-110 | 5'-GCGGAUCCGACUACAACUACG-3'  | (70) |
| ILF3-90  | 5'-CUUCCUAGAGCGUCUAAAAGU-3'  | (70) |
| KHDRBS1  | 5'-GGACCACAAGGGAAUACAA-3'    | (71) |
| LDHA     | 5'-AAGACAUCAUCCUUUAUUC CG-3' | (72) |
| LDHB     | 5'-GUACAGUCCUGAUUGCAUC-3'    | (73) |
| PKM      | 5'-CCACGAGCCACCAUGAUCC-3'    | (65) |
| RBMX     | 5'-CGGAUAUGGUGGAAGUCGA-3'    | (74) |
| SYNCRIP  | 5'-GCUAGUUGCACAUAGUGAU-3'    | (67) |

222

223 The siRNA duplexes were synthesized with 3' UU overhangs by Dharmacon. The siRNAs were  
224 transfected into HeLa cells using Dharmafect 1 transfection reagent according to the  
225 manufacturer's protocol, and the experiments were performed ~72h after siRNA transfection. As  
226 a non-targeting control siControl#1 (Ambion) was used.

227 **Microscopy.** Cells grown on a coverslip in a 12 well plate were fixed with 4% formaldehyde  
228 (Electron Microscopy Sciences) in PBS for 20 min, washed three times with PBS and  
229 permeabilized for 5 min in 0.2% Triton-X100 (Millipore Sigma). The cells were incubated  
230 sequentially with the primary and secondary antibodies diluted in PBS with 3% blocking reagent  
231 (Amersham) for 1 h each with 3x PBS washes in between. Confocal images were taken with  
232 Zeiss LSM 510 microscope under the control of ZEN software (Zeiss). All images from one  
233 experiment were taken under the same microscope settings. Structural illuminated microscopy  
234 super-resolution (SIM) images were taken with Nikon A1R microscope under the control of NIS-  
235 Elements software (Nikon). Digital images were processed with Adobe Photoshop software for  
236 illustrations, all changes were applied to the whole image, and images from the same  
237 experiments were processed with the same settings.

238 **Replicon assay.** Replicon assays were performed essentially as described in (60). Briefly,  
239 purified replicon RNA was transfected into HeLa cells grown on 96 well plates using TransIT  
240 mRNA transfection reagent (Mirus), and the cells were incubated in the growth medium  
241 supplemented with 5 $\mu$ M of cell-permeable Renilla luciferase substrate EnduRen (Promega) at  
242 37C directly in an ID3 multiwell plate reader (Molecular Devices). The measurements were  
243 taken every hour for 18 hours, the data were processed using GraphPad Prism software. Total  
244 replication was calculated as the area under the curve for the kinetic luciferase measurement for  
245 each well, the signal from at least 16 wells was averaged for each sample, unpaired t-test was  
246 used to compare the differences within pairs of experimental and control conditions,  $p < 0.05$  was  
247 considered significant.

248 **Proteomics analysis.** Biotinylated proteins collected from infected (or mock-infected) HeLa  
249 cells grown on a 225cm<sup>2</sup> flask (approximately 3E7 cells/flask) from five independent  
250 experiments were pooled together and run into 12% SDS-PAGE for ~1cm. The gel was stained  
251 with Coomassie and the gel slices containing proteins from infected and mock-infected cells  
252 were excised and processed for proteomics analysis at the Harvard proteomics facility as  
253 follows:

254 *Sample Preparation procedure:* Gel slices were washed in 50 % acetonitrile and rehydrated with  
255 50 mM ammonia bicarbonate trypsin solution for overnight digestion at 37C. The next day  
256 peptides were extracted with a series of elution and completely dried down in a speed vac. The  
257 samples were solubilized in 0.1 % formic acid in water for analysis by tandem mass  
258 spectrometry.

259 *Mass spectrometry analysis:* The LC-MS/MS experiment was performed on a Lumos Tribid  
260 Orbitrap Mass Spectrometer (Thermo Fischer) equipped with Ultimate 3000 (Thermo Fisher)  
261 nano-HPLC. Peptides were separated onto a 150 $\mu$ m inner diameter microcapillary trapping  
262 column packed first with approximately 2cm of C18 Reprosil resin (5 $\mu$ m, 100 Å, Dr. Maisch  
263 GmbH, Germany) followed by PharmaFluidics (Gent, Belgium) 50cm analytical column.  
264 Separation was achieved by applying a gradient from 5– 27% acetonitrile in 0.1% formic acid  
265 over 90 min at 200 nl/min. Electrospray ionization was enabled by applying a voltage of 2 kV  
266 using a homemade electrode junction at the end of the microcapillary column and sprayed from  
267 metal tips (PepSep, Denmark). The mass spectrometry survey scan was performed in the  
268 Orbitrap in the range of 400–1,800 m/z at a resolution of 6 $\times 10^4$ , followed by the selection of the  
269 twenty most intense ions (TOP20) for CID-MS2 fragmentation in the Ion trap using a precursor  
270 isolation width window of 2 m/z, AGC setting of 10,000, and a maximum ion accumulation of

271 100 ms. Singly charged ion species were not subjected to CID fragmentation. The normalized  
272 collision energy was set to 35 V and an activation time of 10 ms. Ions in a 10 ppm m/z window  
273 around ions selected for MS2 were excluded from further selection for fragmentation for 60s.

274 *Data Analysis:* Raw data were submitted for analysis in Proteome Discoverer 2.4 (Thermo  
275 Scientific) software. Assignment of MS/MS spectra was performed using the Sequest HT  
276 algorithm by searching the data against a protein sequence database including all entries from  
277 our Uniport\_Human2018\_SPonly database as well as other known contaminants such as  
278 human keratins and common lab contaminants. Quantitative analysis between samples was  
279 performed by label-free quantitation (LFQ). Sequest HT searches were performed using a 10  
280 ppm precursor ion tolerance and requiring N-/C termini of each peptide to adhere to Trypsin  
281 protease specificity while allowing up to two missed cleavages. Methionine oxidation  
282 (+15.99492 Da), as well as deamidation (+ 0.98402 Da) of Asparagine and Glutamine amino  
283 acids, were set as variable modifications. Special modification of 1xBiotin-tyramide (+361.14601  
284 Da) on Tyrosine amino acid residues was used as a variable modification. All cysteines were set  
285 to a permanent modification with carbamidomethyl (+ 57.02146 Da) due to an alkylation  
286 procedure. All MS2 spectra assignment false discovery rate (FDR) of 1% on both protein and  
287 peptide levels was achieved by applying the target-decoy database search by Percolator (75).

288 *Gene ontology analysis:* The sets of proteins identified in the infected and mock-infected  
289 samples were analyzed for Gene Ontology (GO) term enrichment using PANTHER  
290 classification system web tool (76) against all *Homo sapiens* protein-coding genes using  
291 Fisher's exact test and Bonferroni correction for multiple testing. Only the statistically significant  
292 enrichment results with  $p < 0.05$  are reported.

## 293 **Results**

### 294 **Establishment and characterization of an APEX2-GBF1 system for proximity**

295 **biotinylation.** The Arf-activating function of GBF1 and other ArfGEFs is mediated by their Sec7  
296 domains. A fungal metabolite brefeldin A (BFA) inhibits the Sec7 function of GBF1 and some  
297 other but not all ArfGEFs (77). Previously, we developed a GBF1 construct containing a Sec7  
298 domain from another cellular ArfGEF, ARNO, which is not sensitive to BFA (GARG, from GBF1-  
299 ARNO-GBF1) (78). The advantage of such BFA-insensitive constructs is that the endogenous  
300 GBF1 can be inactivated by BFA so that it is possible to explore the GBF1-related functions  
301 supported exclusively by the exogenously introduced BFA-insensitive GBF1 derivatives. We  
302 also previously established that the C-terminal part of GBF1 downstream of the HDS1 domain is

303 dispensable for viral replication (54, 55). We reasoned that for the proteomics studies of  
304 replication organelles such “minimal” GBF1 constructs would be advantageous since the  
305 interactions with the C-terminal part of GBF1 that are non-essential for viral replication will be  
306 eliminated. Thus, we fused APEX2 peroxidase N-terminally to the GARG truncated at the end of  
307 the HDS1 domain (APEX2-GARG-1060 construct, Fig 1A). We also introduced a FLAG epitope  
308 at the very N-terminus part of the construct. To see if APEX2 fusion is compatible with the  
309 functioning of the GARG construct in viral replication, HeLa cells were transfected with a  
310 plasmid expressing APEX2-GARG-1060 construct, EGFP-GARG-1060 (positive control), or an  
311 empty vector (negative control). The next day the cells were transfected with a polio replicon  
312 RNA expressing a *Renilla* luciferase gene instead of the capsid proteins, and the replication was  
313 monitored in the presence and in the absence of BFA. The inhibitor blocked the replication in  
314 the cells transfected with an empty vector, but cells expressing either APEX2- or EGFP-GARG  
315 fusions similarly supported the replication in the presence of the drug (Fig. 1B, transfection  
316 panel). It should be noted that the replication signal in the presence of BFA is detected only  
317 from the cells expressing the resistant GBF1 constructs, which is limited by the transfection  
318 efficacy. Thus, the APEX2-GARG-1060 construct is fully functional in polio replication.

319 The transiently-transfected cells are not well suited for proteomics studies because the level of  
320 transgene expression varies greatly and also because the transfection reagents and presence  
321 of a plasmid DNA in the cytoplasm could trigger the innate immune responses. Thus, we  
322 established a stable cell line expressing APEX2-GARG-1060 construct by a retrovirus vector  
323 transduction and a clonal selection so that the resulting culture expressed a uniform level of the  
324 transgene. Polio replicon replicated equally efficiently in these cells in the presence and in the  
325 absence of BFA, while in the control HeLa cells BFA blocked polio replicon replication (Fig. 1B,  
326 stable cell line panel). This cell line was used for all further experiments which were performed  
327 in the presence of BFA so that the replication was supported exclusively by the APEX2-GARG-  
328 1060 construct.

329 To assess the protein biotinylation, the cells were infected (or mock-infected) with poliovirus at a  
330 multiplicity of infection (MOI) of 10 plaque-forming units (PFU)/cell (so that all cells are infected)  
331 and the biotinylation reaction was performed at 4 hours post-infection (h p.i.) (in the middle of  
332 the poliovirus replication cycle). The cells were stained with a fluorescent streptavidin conjugate  
333 to visualize the biotinylated proteins, and with an antibody against a viral non-structural antigen  
334 3A. In mock-infected cells, the streptavidin signal was diffusely distributed in the cytoplasm  
335 (although higher magnification images showed some association of the staining with

336 intracellular structures), consistent with the loss of GBF1-specific subcellular targeting of the  
337 APEX2-GARG-1060 construct due to the removal of the C-terminal part of GBF1, containing  
338 most of the membrane-targeting determinants (79, 80) (Fig. 1D, mock). In infected cells,  
339 however, the biotinylation pattern was strictly confined in bright perinuclear rings, the  
340 characteristic localization of poliovirus replication organelles, and, accordingly, was extensively  
341 co-localized with the 3A signal. It was also visibly brighter than the streptavidin signal in mock-  
342 infected cells (Fig. 1D, PV). We also investigated the fine distribution of biotinylated proteins  
343 using structural illuminated superresolution microscopy (SIM). The SIM images showed a  
344 reticulate pattern in mock-infected cells which is likely mostly due to the mitochondria which are  
345 enriched in biotin-containing enzymes (81). In infected cells, a differently structured biotinylation  
346 signal was associated with the replication organelles, as evidenced by the staining for the viral  
347 antigen 2B (Fig. 1E). Interestingly, we observed in many infected cells bright round foci of  
348 biotinylation signal (Fig. 1D, arrow) which were identified as stress granules (see the last section  
349 in the Results).

350 To characterize the specificity of the biotinylation reaction, the cells were similarly infected (or  
351 mock-infected), and at 4 h p.i. they were incubated either with both H<sub>2</sub>O<sub>2</sub> and biotin-phenol, or  
352 with H<sub>2</sub>O<sub>2</sub> or biotin-phenol only, or without any of those compounds. Western blot analysis with  
353 streptavidin conjugated to horseradish peroxidase (HRP) showed two major bands of similar  
354 intensity in all the samples, likely corresponding to the pyruvate carboxylase and mitochondrial  
355 3-methylcrotonyl carboxylase, biotin-containing enzymes previously observed in studies with  
356 APEX2 biotinylation (81). At the same time, only samples incubated in the presence of both  
357 compounds showed extensive biotinylation of additional proteins, confirming the specificity of  
358 the biotinylation reaction. The level of protein biotinylation in infected cells significantly  
359 exceeded that in the mock-infected sample, in accordance with the pattern observed with the  
360 staining of cells with a fluorescent streptavidin conjugate.

361 Thus, the APEX2-GARG-1060 efficiently supports poliovirus replication, it is recruited to the  
362 replication organelles and can specifically biotinylate proteins associated with these structures.

### 363 **Initial characterization of the biotinylated proteins during the time course of infection.**

364 **Cellular proteins.** An important advantage of APEX2-based biotinylation is a short time of the  
365 actual labeling reaction permitting time-resolved snapshots of protein composition. The  
366 replication cycle of poliovirus in HeLa cells takes about 6-8 h. We infected cells expressing  
367 APEX2-GARG-1060 with 10 PFU/cell of poliovirus and performed the biotinylation reactions at  
368 2, 4 and 6 h p.i. The biotinylated proteins were isolated by streptavidin columns and analyzed in

369 a western blot assay with a streptavidin-HRP conjugate for the global biotinylation pattern. At 2  
370 h p.i., the amount of the biotinylated proteins and their pattern were similar in infected and  
371 control samples, and the mock-infected samples did not significantly change during the time  
372 course of the experiment. At 4 and 6 h p.i., protein biotinylation strongly increased in infected  
373 cells, and they were distributed through the whole range of molecular weights. Visually, the  
374 pattern of the biotinylated proteins from the 6 h p.i. sample was the same as at 4 h p.i., but the  
375 amount of the biotinylated proteins was higher (Fig. 2A).

376 We then analyzed if cellular factors ACDB3, OSBP, and PI4KIII $\beta$  which are involved in the PI4P  
377 and cholesterol enrichment of the replication organelles (36, 43, 44, 50) are present in the  
378 biotinylated fraction, which would indicate that they localize close to GBF1 in infected cells. The  
379 infection and biotinylation reaction were performed as for Fig. 2A. The unfractionated lysates  
380 and the proteins recovered in the biotinylated fraction were analysed in western blot with the  
381 indicated antibodies (Fig. 2B). We observed a specific increase of the signals for ACDB3,  
382 OSBP, and PI4KIII $\beta$  in biotinylated fraction only in the infected samples collected at 4, and  
383 especially 6 p.i. Biotinylated OSBP signal was always observed only in infected samples, while  
384 traces of PI4KIII $\beta$  and ACBD3 were also visible in the material recovered from mock-infected  
385 samples (Fig. 2C). We also analyzed the biotinylation of endogenous GBF1, and the APEX2-  
386 GARG-1060 construct itself. Since the APEX2-GARG-1060 construct lacks the C-terminal part  
387 containing the epitope recognized by the anti-GBF1 antibody, it was detected by anti-FLAG  
388 antibodies. Again, the strongest signals for both biotinylated GBF1 and APEX2-GARG-1060  
389 were observed in the 4 and 6 h infected samples (Fig. 2C). The increase of the signal for the  
390 APEX2-GARG-1060 constructs in 4 and 6 h p.i. samples coincided with a noticeable decrease  
391 of the corresponding signal in the total input material, likely reflecting the degradation of the  
392 cytoplasmic, but not replication-organelle associated pools of the protein (Fig. 2C). Surprisingly,  
393 we did not detect biotinylated Arfs, even though they are enriched on the replication organelles  
394 (82, 83), and at least a fraction of Arf molecules is expected to be localized close to GBF1 (data  
395 not shown).

396 **Viral proteins.** The proximity biotinylation approach allowed us to identify specific fragments of  
397 the poliovirus polyprotein localized in the vicinity of GBF1 on the replication organelles. Since  
398 the poliovirus genome is expressed as a single polyprotein undergoing a proteolytic processing  
399 cascade, antibodies against a certain antigen will recognize the final maturation product and all  
400 the intermediate cleavage products containing this antigen. The available panel of antibodies  
401 suitable for western blot (VP3, 2B, 2C, 3A, 3D) covers all known intermediate fragments of the

402 poliovirus polyprotein processing and all individual proteins except capsid proteins VP0 and  
403 VP1, proteases 2A and 3C, and the RNA replication protein primer 3B (Vpg) (Fig. 3, poliovirus  
404 genome and polyprotein processing scheme). All the tested viral antigens were present in the  
405 biotinylated fraction. Interestingly, while in the input material the strongest signals for the viral  
406 antigens were found in the final polyprotein cleavage products, in the biotinylated protein  
407 fraction the intermediate polyprotein cleavage products were overrepresented. For example, an  
408 uncleaved precursor P2P3 was clearly detected in the biotinylated fraction with anti-3A antibody  
409 in 6 h p.i. sample, while this piece of the polyprotein was not visible in the input material (Fig. 3,  
410 anti-3A panel). We also observed a specific increase in the biotinylated fraction of the viral  
411 antigen-positive fragments that do not correspond to the canonical products of the viral  
412 polyprotein processing. Note the red asterisks marking a 3A-positive fragment in the 15-20KDa  
413 range (Fig 3, anti-3A panel, 6 h p.i.), or a 3D-positive fragment of a molecular weight slightly  
414 higher than 3D (Fig. 3, anti-3D panel, 6 h p.i.). This may suggest that the GBF1 environment is  
415 associated with active polyprotein maturation, although a preferential enrichment of larger  
416 polyprotein fragments due to a higher degree of biotinylation cannot be excluded.

417 Collectively, these results demonstrate that APEX2-GARG-1060 in infected cells can specifically  
418 biotinylate both viral and host proteins associated with the replication organelles and that 6h p.i.  
419 samples are the most representative for the characterization of the proteome of the replication  
420 organelles.

421 **Proteomics characterization of the replication organelles.** For the proteomics analysis,  
422 HeLa cells grown on 225 cm<sup>2</sup> flasks were infected (or mock-infected) with poliovirus at an MOI  
423 of 10, the biotinylation reaction was performed at 6 p.i. for 3 min, and the biotinylated proteins  
424 were purified on streptavidin columns. Five independent experiments were performed, and  
425 aliquotes of the isolated proteins were assessed in a western blot assay with a streptavidin-HRP  
426 conjugate. In all experiments, a similar pattern of a highly increased amount of biotinylated  
427 proteins in infected samples was observed, as expected (Fig. 4A). The rest of the purified  
428 biotinylated proteins were pooled together and processed for mass-spectrometry protein  
429 identification and label-free quantitation (LFQ). Upon filtering the identified proteins from  
430 common contaminants, as well as carboxylases which contain naturally covalently attached  
431 biotin, and proteins with peroxidase activity which can likely be biotinylated independently of  
432 APEX2, 369 and 43 proteins were enriched in the infected and non-infected sets, respectively.  
433 192 proteins in the infected sample and 37 proteins in the mock-infected sample were detected  
434 from 2 or more peptides. 331 proteins were found exclusively in the infected sample, while just 5

435 proteins from the mock-infected sample were not identified in the infected sample  
436 (Supplementary Data 1). Among the cellular proteins we previously confirmed to be present  
437 among the biotinylated pool by the western blot analysis (see Fig. 2), GBF1 (Q92538) was  
438 identified from a total of nine peptides, five of them unique (9 total:5 unique) (further on this  
439 designation is used for peptides detected for each protein), while ACBD3 (Q9H3P7) and OSBP1  
440 (P22059) proteins were identified from one peptide each, and PI4KIII $\beta$  (Q9UBF8) was not found  
441 (Supplementary Data 1).

442 Since the proteins were purified upon biotinylation by a GBF1-based construct, one would  
443 expect the presence of at least some known interactors of GBF1 or GTPses Arf. Indeed,  
444 analysis of the proteins using the Biogrid database of curated interaction data (84, 85) identified  
445 17 Arf1, one Arf3, four Arf4, three Arf5, and four Arf6 interactors. Arf3, Arf4 and Arf5 as well as  
446 12 Arf1 and two Arf6 interactors were identified exclusively among the proteins from the infected  
447 sample. Also, 44 proteins were identified as GBF1 interactors, 34 of which were found only in  
448 the infected sample (Supplementary Table 1).

449 The global association of the proteins with cellular structures and pathways was analyzed by  
450 Gene Ontology (GO) term enrichment in the cellular component, molecular function, and the  
451 biological process categories using the PANTHER classification system (76). In general, the GO  
452 term enrichment of the proteins from the infected sample demonstrated a much higher statistical  
453 significance than those from the mock-infected cells, which is to be expected given the  
454 difference in the number of proteins in each sample. In both samples, the most statistically  
455 significantly enriched categories included proteins associated with the cellular secretory  
456 pathway and the chaperon-assisted protein folding. In the mock-infected sample, proteins  
457 associated with the proteasome-dependent protein degradation were among the highly  
458 enriched. In the infected sample, a significant amount of proteins were also associated with the  
459 cytoskeleton function. Yet, the nucleic acid, and in particular RNA metabolism, emerged as the  
460 predominantly enriched GO terms from the infected sample (Fig. 4B and Supplementary Figure  
461 2). Interestingly, 17 proteins were associated with dsRNA binding, 10 of which were present  
462 only in the infected sample (Supplementary Table 1).

463 The literature search revealed that 62 of the proteins identified in the infected sample were  
464 previously reported to have a functional significance for the replication of different enteroviruses,  
465 while 50 more were detected in high-throughput screens as proteins that undergo some  
466 changes upon enterovirus infection, or as interacting partners with the viral proteins, but their  
467 functional significance was not investigated (Supplementary Data 3). The known constituents of



468 the poliovirus replication complex, KH domain-containing, RNA-binding, signal transduction-  
469 associated protein 1 (KHDRBS1, Sam68) (86) was identified from 8 total: 2 unique; splicing  
470 factor, proline- and glutamine-rich (SFPQ) (27) from 10 total: 6 unique, and polyadenylate-  
471 binding protein 1 (PABCP1) (87) from 3 total: 2 unique peptides, exclusively in the infected  
472 sample. 6 total:3 unique peptides shared between poly-(rC)-binding proteins 1 and 2 (PCBP1,  
473 2) (88-90) were identified in the infected sample while one unique peptide for each PCBP1 and  
474 PCBP2 was detected in the mock-infected control. Polypyrimidine tract-binding protein 1 (PTB1)  
475 involved in the activation of the enterovirus IRES-driven translation (91, 92) was detected by  
476 one peptide in both infected and mock-infected samples (Supplementary Data 1).

477 The poliovirus-specific peptides (207 total: 64 unique) identified by the mass-spectrometry  
478 analysis were distributed along the whole viral polyprotein, with an intriguing absence of  
479 peptides covering 2B and 3A-3B regions. An increased clustering of the detected peptides was  
480 observed in the N-terminus of a capsid protein VP1, 3C-3D junction, and in particular in the 2C  
481 region (Fig. 4C). This pattern is in accordance with the data shown in Fig. 3 and confirms that  
482 the GBF1 environment on the replication organelles is enriched in all viral structural and  
483 replication proteins.

484 Overall, these data validate the relevance of the identified cellular proteins for poliovirus  
485 replication and provide an important insight into the viral and cellular protein environment of the  
486 replication organelles in the surroundings of GBF1.

487 **Identification of novel factors affecting viral replication.** One of the major goals of this study  
488 was to identify novel host factors important for viral replication. The selection of the proteins  
489 from a large proteomics dataset for analysis is inevitably arbitrary, but our general criteria were  
490 that the proteins should be detected from multiple peptides in the infected sample (i.e. highly  
491 enriched), with the previously uncharacterized role in enterovirus replication, and representing  
492 different functional clusters.

493 We selected the following groups: 1. Glycolytic enzymes. Fructose-bisphosphate aldolase A  
494 (AldoA), pyruvate kinase (PKM), L-lactate dehydrogenase chain A and B (LDHA and LDHB))  
495 detected from (32 total:15 unique), (15 total:11 unique), (6 total:2 unique) and (4 total: 2 unique)  
496 peptides in the infected sample, respectively. Apart from being highly enriched, the group of  
497 glycolytic enzymes was selected because LDHA and LDHB are reported Arf interactors and  
498 because the glycolytic pathway provides substrates for *de novo* nucleotide synthesis, which  
499 may be important for rapidly replicating RNA viruses (84, 85, 93-95).

500 2. The highly enriched RNA binding proteins. Heterogeneous nuclear ribonucleoproteins A0,  
501 H2, H3, R, U (HNRNPA0, H2, H3, R, U), heterogeneous nuclear ribonucleoprotein Q  
502 (SYNCRIP), Ewing Sarcoma Breakpoint Region 1 (EWSR1), and RNA-binding motif protein, X  
503 chromosome (RBMX) were among the most enriched in the infected sample (10:3, 15:6, 8:5,  
504 10:6, 27:11, 8:6, 12:5, and 7:6 of total: unique peptides, respectively). SYNCRIP and HNRNPU  
505 were previously reported in a proteomics screen detecting proteins bound to poliovirus RNA.  
506 The depletion of HNRNPU did not affect the virus yield, the contribution of SYNCRIP was not  
507 analyzed (96).

508 3. A potential antiviral factor. A dsRNA binding protein ILF3 was identified from (8 total:4 unique)  
509 peptides in the infected sample. This protein was shown to be important for the establishment of  
510 dsRNA-induced anti-viral signaling and to either promote or inhibit the replication of diverse  
511 viruses (97-101). The ILF3 gene is expressed as multiple isoforms of the two major variants of  
512 90KDa and 110KDa proteins. Both 90KDa and 110KDa proteins have two dsRNA binding  
513 domains, with an extended C-terminal GQSY-reach region in the latter (102). A 90KDa isoform  
514 of ILF3 was demonstrated to inhibit translation of a poliovirus-rhinovirus chimera RNA in a cell-  
515 type dependent manner by binding to the rhino- but not poliovirus IRES (103).

516 We screened the effects of the siRNA-mediated depletion of these proteins on polio replicon  
517 replication and the accumulation of the viral protein 2C upon infection. In the replicon assay, the  
518 RNA is transfected into the cells bypassing the normal virion-receptor mediated delivery, so it  
519 reflects the RNA translation-replication step of the viral life cycle, while the accumulation of 2C  
520 upon infection also integrates the effects of virion-receptor interaction, penetration and  
521 uncoating. As a control for the screening methods, we also included siRNA against KHDRBS1  
522 (Sam68) (identified from 8 total: 2 unique peptides in our proteomics dataset), which was  
523 previously shown to bind poliovirus polymerase 3D and promote viral replication (86).

524 Depletion of Sam68 inhibited polio replication in both replication and infection assays, as  
525 expected, thus validating our approach (Supplementary Figure 1). Among all the proteins  
526 tested, only depletion of LDHA was toxic to cells, so its specific effect on polio replication was  
527 impossible to evaluate in this system. Depletion of PKM, LDHB, SYNCRYP and HNRNPU  
528 affected the replication in one of the assays only, suggesting a moderate contribution of these  
529 proteins in the virus life cycle, at least in the cell culture conditions. Curiously, depletion of  
530 RBMX strongly increased the replicon replication but decreased the accumulation of 2C upon  
531 infection. Depletion of AldoA, HNRPA0 and EWSR1 showed consistent negative effects on  
532 polio replication in both assays, while that of HNRNPR, HNRNPH2, HNRNPH3, and in particular

533 the 90KDa isoform of ILF3 strongly increased the replication in both assays (Supplementary  
534 Figure 1).

535 Thus, our dataset reveals novel host factors with stimulatory and inhibitory effects on poliovirus  
536 replication.

537 **AldoA, EWSR1 and ILF3-90 similarly control the replication of diverse enteroviruses.** The  
538 proteins AldoA, EWSR1, and the 90K isoform of ILF3 whose depletion consistently significantly  
539 affected polio replication were selected for a more detailed analysis. The siRNA knockdown of  
540 expression of AldoA and EWSR1 significantly inhibited the replication of both polio and  
541 Coxsackie B3 replicons, while the stimulatory effect of ILF3-90 depletion was detected only with  
542 polio replicon (Fig. 5A, B). In conditions of *bona fide* virus infection, the depletion of AldoA and  
543 EWSR1 inhibited, while the depletion of ILF3-90 stimulated the infectious virion yield of both  
544 viruses (Fig. 5C). Interestingly, while cells treated with the siRNAs against these proteins did not  
545 show any obvious signs of cytotoxicity, the viability assay based on the measurement of ATP  
546 showed significantly lower values for AldoA depletion (Fig. 5A, viability). We compared the ATP  
547 measurement viability test with that based on the activity of a mitochondrial respiratory chain.  
548 The latter test did not detect any difference in the cell viability upon depletion of any protein  
549 (Fig. 5D). This suggests that the negative effect of the AldoA depletion on the enterovirus  
550 replication may be explained by its requirement for ATP production in HeLa cells.

551 Finally, we analyzed the cellular distribution of AldoA, EWSR1 and ILF3-90 upon infection.  
552 AldoA in mock-infected cells was localized in a dot-like pattern in the cytoplasm, especially in  
553 the perinuclear region, and a significant amount of signal was detected in the nucleus, in  
554 accordance with the previous report of nuclear accumulation of AldoA in actively dividing cells  
555 (104). In poliovirus-infected cells the cytoplasmic AldoA signal was confined within the area of  
556 the replication organelles, as evidenced with the staining for the viral membrane-targeted  
557 protein 3A (Fig. 6A). Interestingly, Aldo-A positive dots were very closely associated with the  
558 signal for dsRNA, but the signals were adjacent, not colocalizing (Fig. 6B).

559 EWSR1 in mock-infected cells was found exclusively in the nuclei. In poliovirus-infected cells as  
560 early as 2 h p.i. large EWSR1-positive punctae appeared in the cytoplasm, and by 4 hp.i., in the  
561 middle of poliovirus infectious cycle, all infected cells had exclusively cytoplasmic EWSR1 signal  
562 with multiple punctae. By 6 h.p. ESWR1 signal concentrated in the perinuclear area colocalizing  
563 with the replication organelles, and the number of punctae per cell was decreased, although  
564 they were still clearly detectable in the majority of the cells (Fig. 7A). The cytoplasmic EWSR1

565 signal in infected cells outside of the punctae strongly colocalized with the structures positive for  
566 a viral antigen 3B (Vpg). 3B signal may correspond to the RNA replication primer in a free form,  
567 or attached to the 5' of viral RNAs, but may also be detected as a part of intermediate  
568 polyprotein processing products (Fig. 7B). The cytoplasmic punctae pattern of ESWR1 was  
569 highly reminiscent of the development of stress granules upon poliovirus infection. To test that,  
570 we stained mock-infected and infected cells for EWSR1 and GTPase Activating Protein (SH3  
571 Domain) Binding Protein 1 (G3BP1), a stress granule assembly factor known to be recruited to  
572 poliovirus-induced stress granules (105). Indeed, in infected cells, the cytoplasmic punctae of  
573 EWSR1 and G3BP1 signals colocalized perfectly confirming that these structures are stress  
574 granules (Fig. 7C). The detection of a stress granule protein upon proximity biotinylation by a  
575 GBF1-derived construct was somewhat unexpected since we are not aware of reports of GBF1  
576 targeting to stress granules in infected or otherwise stressed cells. We analyzed the biotinylation  
577 pattern relative to the G3BP1 signal in APEX2-GARG-1060 cells. In infected cells we observed  
578 multiple bright biotinylation-positive punctae colocalizing with G3BP1-containing stress granules  
579 in the cytoplasm, explaining the stress granule protein labeling by APEX2-GARG-1060  
580 construct (Fig. 7D). Whether endogenous GBF1 can be associated with stress granules upon  
581 infection, or this is a phenomenon specific to the artificial truncated GBF1 construct requires  
582 further investigation.

583 Similar to EWSR1, ILF3-90 was localized exclusively in the nuclei of mock-infected cells. Upon  
584 poliovirus infection, ILF3-90 signal became exclusively cytoplasmic and was concentrated on  
585 the outside margin of the replication organelles, with some of the ILF3-90 distributed within the  
586 inner area of the replication organelles (Fig. 8A). The foci of ILF3-90 within the replication  
587 organelles strongly colocalized with the dsRNA signal, arguing that its anti-viral activity relies on  
588 its dsRNA binding capacity (Fig. 8B).

589 Overall, our data characterize novel proteins affecting the enterovirus replication and  
590 demonstrate the complex dynamics of translocation and association with the replication  
591 organelles of multiple cellular proteins, underscoring the massive reorganization of the  
592 architecture and metabolism of infected cells.

593

## 594 **Discussion**

595 Virtually all stages of the enterovirus replication cycle in a cell are associated with the  
596 specialized membranous structures, replication organelles. While their morphological

597 development is extensively documented since the early days of electron microscopy, the  
598 landscape of the host and viral proteins on the membranes of the replication organelles and  
599 their functional associations are understood only superficially. Here, we used a proximity  
600 biotinylation approach to identify proteins localized on the replication organelles in the vicinity of  
601 GBF1, a cellular factor indispensable for the RNA replication of all enteroviruses tested so far  
602 (47, 61, 106-108). Our GBF1 construct fused to a peroxidase APEX2 had two important  
603 modifications. First, the removal of the C-terminal half of GBF1 eliminated the interactions with  
604 the cellular proteins non-essential for viral replication (54). Second, our GBF1 construct had a  
605 BFA-resistant Sec7 domain, which allowed us to perform infections in the presence of BFA. In  
606 these conditions, the endogenous GBF1 was inactivated and the viral replication was supported  
607 only by the APEX2-GBF1 fusion increasing the specificity of the detection of proteins relevant  
608 for the functioning of the viral replication complexes. The removal of the C-terminal part of GBF1  
609 also resulted in the loss of a specific membrane targeting of the construct in non-infected cells,  
610 while upon infection it was effectively recruited to the membranes of the replication organelles.  
611 Accordingly, the number of proteins biotinylated by this construct was significantly higher in  
612 infected than in non-infected cells.

613 ***Our data in the context of other high throughput studies of cellular factors involved in***  
614 ***enterovirus replication.*** The high throughput methods of identification of host factors involved  
615 in the viral replication can be divided into two classes – the ones that are based on a phenotypic  
616 signal of depletion of a cellular factor on viral replication, and the unbiased methods that seek to  
617 identify all the proteins somehow associated with the viral replication complexes. Each of these  
618 approaches can have different technical implementations which have their specific advantages  
619 and limitations. The phenotype-based methods usually use siRNA, shRNA or CRISPR-CAS9-  
620 based genetic screens targeting the expression of the cellular genes, and by definition would  
621 identify functionally important host factors whose depletion either suppresses or promotes the  
622 replication. However, these methods may likely miss the proteins important for viral replication  
623 that are also essential for cellular viability. Moreover, the prolonged incubation of cells without  
624 the expression of a particular protein can induce unpredictable compensatory changes in the  
625 expression of other cellular factors which may complicate the interpretation of results. The  
626 unbiased approaches, on the other hand, aim to identify all the proteins found at a specific  
627 location at a given time, but do not provide immediate information on their functional  
628 significance. The spectrum of identified proteins in unbiased approaches depends on the  
629 sample enrichment, protein labeling, purification and detection techniques, thus different  
630 proteins may be visible or hidden depending on a specific protocol. For example, in our

631 proximity biotinylation approach, we observed that at least one protein (PI4KIII $\beta$ ) was found in  
632 the biotinylated fraction by western blot but was not identified by subsequent mass-spec  
633 analysis. Also, while high enrichment of Arfs on the replication organelles is well documented  
634 (82, 83), and at least some amount of Arfs should be close to GBF1, we did not identify Arfs  
635 among the proteins biotinylated by our APEX2-GBF1 construct. This may be explained by the  
636 intrinsic limitation of the proximity biotinylation which depends on the accessibility of electron-  
637 rich amino-acids such as tyrosine, histidine, and tryptophan that can serve as acceptors of  
638 biotinphenoxy radicals (109), i.e. the negative results cannot be unequivocally interpreted as  
639 the absence of the protein in the vicinity of the bait. The exposure of suitable amino-acids may  
640 be particularly limiting for the detection of small proteins like Arfs.

641 Previously, both genetic screens and unbiased proteomic approaches were used to  
642 characterize host factors involved in the enterovirus replication. RNAi screens were used by Wu  
643 et al. to identify factors important for replication of enterovirus A71 in RD cells, by Coyne et al.  
644 to find those affecting replication of poliovirus and Coxsackievirus B3 in microvascular  
645 endothelial cells, a model of the blood-brain barrier, and by van der Sanden et al. to reveal host  
646 proteins restricting or promoting the replication of vaccine strains of poliovirus in Vero cells (110-  
647 112). Among the most comprehensive unbiased proteomic screens, van Kuppeveld group used  
648 a quantitative characterization of the total protein abundance and phosphorylation status during  
649 the time course of Coxsackievirus B3 infection in HeLa cells (113), while Lenarcic and  
650 colleagues also used HeLa cells to analyze cellular proteins interacting with poliovirus RNA  
651 using labeling of the RNA upon replication with 4-thiouridil followed by crosslinking of RNA-  
652 bound proteins (96). Flather et al. characterized the landscape of the nuclear proteins released  
653 in the cytoplasm upon rhinovirus infection (27), and Saeed et al. defined the cellular proteins  
654 cleaved by enterovirus proteases (114). A comparison of our dataset with those previous  
655 reports revealed a particularly strong overlap with the proteins identified as bound to poliovirus  
656 RNA (96). From the 81 proteins reported in that study, 38 were also detected by our approach,  
657 which supports the localization of GBF1 on the replication organelles close to the RNA  
658 replication complexes. Among the genetic screens, our dataset shared 14 genes with those  
659 found to be important to support enterovirus 71 replication (112), 13 genes promoting, and six  
660 genes restricting poliovirus replication (111). Only VCP (valosine-containing protein, a  
661 multifunctional abundant cellular protein involved among other functions in protein quality  
662 control at the ER and implicated in the replication of multiple DNA and RNA viruses (115)) and  
663 GBF1 were found in our, and two genetic screens (Supplementary Figure 3). Thus, it is

664 important to use different complementary approaches to elucidate the full spectrum of the host  
665 proteins involved in viral replication.

666 ***Viral proteins.*** Among the viral proteins identified in the biotinylated fraction, we observed an  
667 increased proportion of the incomplete products of the poliovirus polyprotein cleavage, including  
668 some of the fragments that could not be matched with the known intermediates of the  
669 polyprotein processing. This suggests that GBF1 on the replication membranes is localized  
670 close to the sites of active polyprotein processing. This would be in accordance with the  
671 requirement of GBF1 activity for the functioning of the viral RNA replication complexes and the  
672 fact that viral replication complexes contain proteins that need to be assembled *in cis*, i.e.  
673 derived from the same polyprotein molecule (13, 116-118). On the other hand, an artificial  
674 increase of the large polyprotein fragment signal due to a more efficient purification because of  
675 a higher proportion of biotinylated amino-acids cannot be excluded. Interestingly, while the large  
676 precursors were easily detected in a western blot assay of purified biotinylated proteins, the  
677 mass-spectrometry analysis identified viral polypeptides overlapping the 3C-3D but not any  
678 other polyprotein cleavage sites, suggesting that most of the polyprotein processing events are  
679 very rapid.

680 ***Arfs and Arf effector proteins.*** GBF1 is an activator of small GTPases of the Arf family and  
681 activated Arfs recruit to membranes multiple Arf effector proteins that establish a biochemically  
682 distinct local membrane environment (119, 120). The Arf activating function of GBF1 is essential  
683 for the enterovirus replication, and all Arf isoforms massively associate with the replication  
684 organelles (54, 82, 83). Thus, it is likely that in infected cells Arfs would also recruit the effector  
685 proteins to the membranes of the replication organelles which may contribute to the functioning  
686 of the replication complexes. Indeed, we identified multiple proteins reported to interact with  
687 different Arfs, and the interactors of Arf1 were the most numerous. Given that the depletion of  
688 Arf1 affects poliovirus replication much stronger than depletions of other Arfs (83), further  
689 detailed investigation of Arf1 effectors on the replication organelles may uncover novel factors  
690 important for the viral replication. For our initial characterization of Arf effectors, we chose l-  
691 lactate dehydrogenase chains A and B (LDHA and LDHB), reported to interact with Arf1, 4 and  
692 5 (84). However, the siRNA-mediated depletion of LDHA was highly toxic to cells while  
693 depletion of LDHB had no effect on the viral replication. Among other Arf effector proteins, we  
694 identified in our dataset, Cytohesin2/ARNO, a BFA-insensitive ArfGEF, may be of particular  
695 interest. ARNO in non-infected cells regulates membrane trafficking and actin polymerization at  
696 the plasma membrane through activation of Arf6, but it can also activate other Arfs, and is itself

697 an Arf1 and Arf6 effector protein (77, 121, 122). Thus, it is likely that in addition to the GBF1-  
698 mediated Arf activation, the ARNO-dependent pathway of Arf activation operates on the  
699 replication organelles. The existence of such a pathway may contribute to the establishment of  
700 resistance to inhibitors of GBF1, such as BFA and similar molecules.

701 ***Both replication-promoting and replication-restricting cellular factors are identified by***  
702 ***GBF1-specific biotinylation.*** We analyzed the effect of depletion of several proteins belonging  
703 to different functional groups that were significantly enriched in the dataset from the infected  
704 cells on viral replication. AldoA was one of several glycolytic enzymes biotinylated by APEX2-  
705 GBF1 in poliovirus-infected cells, and its depletion significantly inhibited the viral replication. The  
706 infection-specific biotinylation of multiple glycolytic enzymes suggests an active supply of the  
707 replication organelles with the glycolysis pathway-derived metabolites. Recently, the recruitment  
708 of glycolytic enzymes to the replication organelles of tombusviruses, a group of positive-strand  
709 plant viruses has been discovered, and it was shown that these enzymes are involved in  
710 generating a high local level of ATP required to support the viral replication (123-125).  
711 Interestingly, the siRNA knockdown of AldoA expression also resulted in a reduction of the  
712 cellular ATP level reflected in a lower signal of an ATP-based cell viability test. The AldoA-  
713 dependent ATP production was shown to be important for the replication of the Japanese  
714 encephalitis virus, a positive-strand RNA virus of the Flaviviridae family (126). AldoA converts  
715 fructose 1,6-bisphosphate into glyceraldehyde 3 phosphate (G3P) and dihydroxyacetone  
716 phosphate (DHAP) which not only sustain ATP generation in the glycolytic pathway but also  
717 serve as substrates for multiple biosynthetic reactions including *de novo* nucleotide synthesis  
718 (reviewed in (127)). It is likely that the local nucleotide synthesis sustained in part by the  
719 recruitment of the glycolytic enzymes generating the necessary substrates at the replication  
720 organelles is a conserved feature of the replication of positive-strand RNA viruses. The  
721 importance of *de novo* nucleotide synthesis on the picornavirus replication organelles is  
722 highlighted by the previous observations that the partially purified membrane-associated  
723 replication complexes more efficiently incorporate in the replicating RNA exogenously added  
724 nucleoside mono and diphosphates compared to nucleoside triphosphates (128).

725 The RNA metabolism proteins were highly enriched in the proteome recovered from the infected  
726 cells. Among the RNA-binding proteins, we focused on EWSR1 and ILF3. EWSR1 is an RNA  
727 and DNA binding multifunctional protein involved in different networks of regulation of gene  
728 expression (129). Depletion of EWSR1 significantly inhibited the replication of both poliovirus  
729 and Coxsackie virus B3. The ILF3 gene is expressed as two major isoforms of 110 and 90 KDa



730 which both share the dsRNA binding domain and regulate multiple steps of RNA metabolism in  
731 the nucleus and the cytoplasm (130). Since the proteomics data did not distinguish the ILF3  
732 isoforms, we separately targeted the expression of 110K and 90K proteins. Depletion of ILF3-90  
733 but not IF3-110K stimulated the infectious virus yield of poliovirus and Coxsackievirus B3. Thus  
734 ILF3-90K may be a broad anti-enterovirus factor. Our data are in contrast with the previously  
735 reported specific anti-viral activity of ILF-3 depending on its binding to rhinovirus but not  
736 poliovirus IRES (103). This may reflect the difference in the experimental systems used, but the  
737 dsRNA-binding capacity of ILF3-90 supported by our data would likely confer the capacity to  
738 interfere with the replication of diverse RNA viruses.

739 Both EWSR1 and ILF3-90 were strictly confined in the nuclei before infection, while in infected  
740 cells starting from the middle of the infectious cycle their localization was exclusively  
741 cytoplasmic. The disruption of the nucleo-cytoplasmic barrier is caused by the cleavage of  
742 nucleoporins by enterovirus protease 2A, which also cleaves a translation initiation factor  
743 eIF4G. This results in a rapid inhibition of the mRNA export from the nucleus and cap-  
744 dependent translation of cellular mRNAs (18, 20, 21). In addition, the viral proteases 3C and  
745 3CD cleave the core components of RNA polymerase II (131, 132). The rapid and profound  
746 inactivation of the cellular gene transcription and translation implies that the proteins present in  
747 the cell before infection must contain the full complement of factors required to support the viral  
748 replication. This also implies that the cells must dispose of some anti-viral measures ready to be  
749 deployed without significant input from the activation of new gene expression. The nuclear  
750 depot of RNA-binding proteins thus represents an important resource of both pro- and anti-viral  
751 factors. Interestingly, the major ILF3-90 signal was outlining the outer border of the replication  
752 organelle area. It is tempting to speculate that this represents the visual manifestation of the  
753 protective function of the membranous scaffold of the replication organelles hiding the active  
754 replication complexes from the access of anti-viral factors.

755 Here we selected a few highly abundant proteins for initial characterization, however, the  
756 abundance upon the proximity biotinylation-based detection reflects the combination of three  
757 variables- the abundance of the protein in a cell, its retention close to the bait, and the exposure  
758 of the amino-acids that can accept the biotinphenoxy radicals. This may skew the  
759 representation of the actual enrichment of proteins at the bait construct, thus the less abundant  
760 proteins specifically detected at the replication organelles should also be investigated in the  
761 future. Overall, our data significantly increased the knowledge of the cellular proteins associated  
762 with the enterovirus replication organelles and provide an important resource for the rational

763 approach for the development of antiviral strategies targeting conserved steps of enterovirus  
764 replication.

765

766

## 767 **Figure legends**

### 768 **Figure 1. Characterization of the APEX2-GBF1 proximity biotinylation system. A.**

769 Schemes of the GBF1 domain organization and the C-terminally truncated GBF1 constructs  
770 fused to EGFP (positive control) and APEX2. In both GBF1 truncated constructs the cognate  
771 Sec7 domain is substituted for a BFA-resistant Sec7 domain from another ArfGEF, ARNO. **B.**  
772 HeLa cells were transfected with plasmids expressing the C-terminally truncated GBF1 fusions  
773 with APEX2 or EGFP, or an empty vector, and the polio replicon replication was assessed in the  
774 presence or absence of 2µg/ml of BFA. **C.** The polio replicon replication assay was performed in  
775 the control HeLa cells, or the stable HeLa cell line expressing APEX2-GARG-1060 with or  
776 without 2µg/ml of BFA. **D.** The stable HeLa cells line expressing APEX2-GARG-1060 was  
777 infected (or mock-infected) with 10 PFU/cell of poliovirus, and the biotinylation reaction was  
778 performed at 4 h p.i. The cells were processed for visualization of biotinylated proteins with a  
779 fluorescent streptavidin conjugate and staining for a poliovirus antigen 3A. **E.** The stable HeLa  
780 cells expressing APEX2-GARG-1060 cells were infected (or mock-infected) with poliovirus and  
781 the biotinylation reaction was performed as in D. The cells were stained with a fluorescent  
782 streptavidin conjugate and antibodies against a poliovirus antigen 2B and processed for  
783 structural illumination superresolution microscopy. The arrow shows round bright biotinylation-  
784 positive structures identified as stress granules. The scale bar is 10µm. **F.** The stable HeLa cell  
785 line expressing APEX2-GARG-1060 was infected (PV), or mock-infected (M) with 10 PFU/cell of  
786 poliovirus, and the specificity of the protein biotinylation was assessed by performing the  
787 biotinylation reaction at 4 h p.i. with biotin-phenol (BP) and hydrogen peroxide (complete  
788 reaction), or without one, or both of the compounds.

### 789 **Figure 2. Known cellular proteins recruited to the replication organelles are biotinylated**

790 **by FLAG-APEX2-GARG1060. A.** The stable HeLa cell line expressing FLAG-APEX2-GARG-  
791 1060 was infected (PV), or mock-infected (M) with 10 PFU/cell of poliovirus, and the  
792 biotinylation reactions were performed at the indicated times post-infection. The biotinylated  
793 proteins were collected on streptavidin beads, resolved on SDS-PAGE and analyzed in a  
794 Western blot with HRP-conjugated streptavidin. **B.** Scheme of the biotinylation experiment for

795 comparison of the biotinylated protein fraction (strep pull-down) with the total proteins in the  
796 cellular lysates (input). **C.** The stable HeLa cells line expressing APEX2-GARG-1060 was  
797 infected (PV), or mock-infected (M) with 10 PFU/cell of poliovirus, the biotinylation reactions  
798 were performed at 2, 4, and 6 h p.i., and the unfractionated cellular lysates (input) and the  
799 biotinylated proteins isolated by streptavidin beads were analyzed with the indicated antibodies  
800 against known cellular factors recruited to the replication organelles in a western blot. Anti-  
801 FLAG antibodies recognize the APEX2-GARG-1060 protein.

802 **Figure 3. Biotinylation of the viral proteins by APEX2-GARG-1060.** **A.** Poliovirus genome  
803 and polyprotein processing scheme. The cleavage sites for the viral proteases 2A, 3C, and 2CD  
804 are indicated by green, red, and blue filled triangles, respectively. The dashed empty green  
805 triangle indicates a 2A cleavage site in 3D believed to be dispensable for replication, the purple  
806 star indicates an autocatalytic cleavage site in VP0. **B.** The stable HeLa cell line expressing  
807 APEX2-GARG-1060 was infected (PV), or mock-infected (M) with 10 PFU/cell of poliovirus, and  
808 the biotinylation reactions were performed at the indicated times post-infection. The biotinylated  
809 proteins were collected on streptavidin beads, resolved on SDS-PAGE and analyzed in a  
810 Western blot with antibodies against the indicated viral antigens. The antibodies recognize the  
811 final and intermediate polyprotein cleavage products containing the corresponding antigen. Red  
812 stars on anti-3A and anti-3D panels indicate polyprotein fragments that do not match the known  
813 stable polyprotein cleavage products.

814 **Figure 4. Proteomics characterization of the proteins biotinylated by FLAG-APEX2-**  
815 **GARG1060.** **A.** In five independent experiments, the stable HeLa cell line expressing APEX2-  
816 GARG-1060 was infected (PV), or mock-infected (M) with 10 PFU/cell of poliovirus, and the  
817 biotinylation reaction was performed at 6 h p.i. The biotinylated proteins were purified by  
818 streptavidin beads and analyzed in a Western blot with HRP-streptavidin. The biotinylated  
819 proteins from these five infected and mock-infected samples were pooled for further proteomics  
820 analysis. Full proteomics data is available in Supplementary data 1. **B.** Gene ontology (GO)  
821 enrichment analysis of the proteomics data using PANTHER classification system (76). Bubble  
822 graphs show the number of proteins associated with a particular GO term (bubble size), the  $\log_2$   
823 of enrichment over the expected non-specific associations of genes in the dataset with a  
824 particular GO term (x-axis), and the statistical significance of the observed enrichment (negative  
825  $\log_{10}$  of p-value, y-axis). The five of the most statistically significantly enriched GO terms for  
826 proteins from infected and mock-infected samples are shown. The full GO analysis is available  
827 in Supplementary data 2. **C.** The distribution of the poliovirus-specific peptides identified by

828 mass-spectrometry analysis over the poliovirus polyprotein. The x-axis shows amino-acid  
829 positions in the poliovirus polyprotein, the y-axis shows how many times a particular amino-acid  
830 is detected.

831 **Figure 5. Analysis of the effect of siRNA-mediated knockdown of expression of AldoA,**  
832 **EWSR1 and ILF3-90 on enterovirus replication. A, B.** HeLa cells were transfected with  
833 siRNAs specific against AldoA, EWSR1 and 90KDa isoform of ILF3, or non-targeting control  
834 siRNA, and polio or Coxsackie B3 replicon replication assays were performed 72 h post siRNA  
835 transfection. The total replication signal was calculated as the area under the corresponding  
836 kinetics curves. Cell viability signal is proportional to the level of ATP in cells. Western blots  
837 show the efficacy of siRNA-mediated knockdown of the targeted proteins. **C.** HeLa cells were  
838 transfected with siRNAs specific against AldoA, EWSR1 and 90KDa isoform of ILF3, or non-  
839 targeting control siRNA. 72 h post siRNA transfection the cells were infected with an MOI of 1  
840 PFU/cell of poliovirus or Coxsackie virus B3, and the total virus yield was determined at 6 h p. i.  
841 Western blots show the efficacy of siRNA-mediated knockdown of the targeted proteins. **D.**  
842 HeLa cells were transfected with siRNAs specific against ALdoA, EWSR1 and 90KDa isoform of  
843 ILF3, or non-targeting control siRNA, and the cell viability assays detecting the level of ATP or  
844 the activity of the mitochondrial respiratory chain enzymes were performed 72h post siRNA  
845 transfection. Western blots show the efficacy of siRNA-mediated knockdown of the targeted  
846 proteins.

847

848 **Figure 6. AldoA localization in infected and mock-infected cells. A, B.** Confocal images of  
849 HeLa cells infected (or mock-infected) with 10 PFU/cell of poliovirus, fixed at 4 h p.i. and  
850 processed for staining with antibodies against AldoA and a viral antigen 2B, or AldoA and  
851 dsRNA, respectively. Scale bar is 10  $\mu$ m.

852

853 **Figure 7. Cytoplasmic translocation of EWSR1 and its association with stress granules**  
854 **upon poliovirus infection. A.** Confocal images of HeLa cells infected (or mock-infected) with  
855 10 PFU/cell of poliovirus, fixed at 2, 4 and 6 h p.i and stained with antibodies against EWSR1  
856 and the viral replication antigen 3B. **B.** High magnification confocal images of HeLa cells  
857 infected (or mock-infected) and processed as in A at 4 h p.i. Note the association of cytoplasmic  
858 EWSR1 signal outside of stress granules with the 3B-positive structures. **C.** Confocal images of  
859 HeLa cells infected (or mock-infected) as in A, fixed at 4 h.i. and stained with the antibodies

860 against EWSR1 and a stress granule component G3BP1. Scale bar is 10  $\mu\text{m}$ . **D.** Confocal  
861 images of HeLa cells stably APEX2-GARG-1060 infected (or mock-infected) as in A, and  
862 processed at 4 h p.i. for biotinylation reaction and subsequent staining with antibodies against a  
863 stress granule component G3BP1. Scale bar is 5  $\mu\text{m}$ .

864 **Figure 8.** ILF3-90 associates with dsRNA in poliovirus-infected cells. **A, B.** Confocal images of  
865 HeLa cells infected (or mock-infected) with 10 PFU/cell of poliovirus, fixed at 4 h p.i. and  
866 processed for staining with antibodies against ILF3-90 and a viral antigen 2B, or ILF3-90 and  
867 dsRNA, respectively. Scale bar is 10  $\mu\text{m}$ . Note the concentration of ILF3-90 signal on the outer  
868 border of the replication organelles and its association with dsRNA inside the replication  
869 organelles.

870

871

872 **Supplementary Data 1.** Proteomics dataset from LFQ proteomics analysis of the proteins  
873 purified upon proximity biotinylation of stable HeLa cell line expressing APEX2-GARG-1060  
874 infected, or mock-infected with 10 PFU/cell of poliovirus at 6 h p.i.

875 **Supplementary Data 2.** PANTHER Gene Ontology (GO) Overrepresentation Test (Released  
876 20210224) with the proteomics datasets from the poliovirus-infected and mock-infected cells  
877 (Supplementary Data 1). GO Ontology database DOI: 10.5281/zenodo.5228828 Released  
878 2021-08-18. Analysis performed: Fisher exact test with Bonferroni correction. Only statistically  
879 significant enrichments ( $p$ -value  $<0.05$ ) are shown.

880 **Supplementary Figure 1.** HeLa cells were transfected with siRNAs specific against the  
881 indicated cellular proteins, or non-targeting control siRNA. Polio replicon replication and  
882 poliovirus infection assays were performed 72 h post siRNA transfection The total replication  
883 signal was calculated as the area under the corresponding kinetics curves. For infection assay,  
884 the cells were infected with an MOI of 10 of poliovirus (or mock infected), and processed for  
885 western blot with anti-poliovirus 2C antibodies at 4 h p.i. Proteins in red were taken for further  
886 analysis. KHDRBS1 (green) is a positive control for a cellular factor known to affect poliovirus  
887 replication (86). Each assay was performed at least two time for each protein, representative  
888 results are shown.

889

890 **Supplementary Table 1.** Analysis of potential interactors from the proteomics datasets from the  
891 poliovirus-infected and mock-infected cells (Supplementary Data 1) using the Biogrid database  
892 of curated interaction data (84, 85).

893 **Supplementary Table 2.** Analysis of literature on the association of the proteins from the  
894 proteomics datasets from the poliovirus-infected and mock-infected cells (Supplementary Data  
895 1) for their involvement in enterovirus replication.

896

897 **References**

- 898 1. Minor P. 2014. The polio endgame. *Hum Vaccin Immunother* 10:2106-8.
- 899 2. Reed Z, Cardoso MJ. 2016. Status of research and development of vaccines for enterovirus 71.  
900 *Vaccine* 34:2967-2970.
- 901 3. Oberste MS, Moore D, Anderson B, Pallansch MA, Pevear DC, Collett MS. 2009. In vitro antiviral  
902 activity of V-073 against polioviruses. *Antimicrob Agents Chemother* 53:4501-3.
- 903 4. Thibaut HJ, De Palma AM, Neyts J. 2012. Combating enterovirus replication: state-of-the-art on  
904 antiviral research. *Biochem Pharmacol* 83:185-92.
- 905 5. Benschop KSM, Van der Avoort HGAM, Duizer E, Koopmans MPG. 2015. Antivirals against  
906 enteroviruses: a critical review from a public-health perspective. *Antiviral Therapy* 20:121-130.
- 907 6. Racaniello VR. 2013. Picornaviridae: The Viruses and Their Replication. *In* David M. Knipe PMH  
908 (ed), *Fields virology*, Sixth ed.
- 909 7. Lawson MA, Semler BL. 1992. Alternate Poliovirus Nonstructural Protein Processing Cascades  
910 Generated by Primary Sites of 3c-Proteinase Cleavage. *Virology* 191:309-320.
- 911 8. Ypma-Wong MF, Semler BL. 1987. Processing determinants required for in vitro cleavage of the  
912 poliovirus P1 precursor to capsid proteins. *J Virol* 61:3181-9.
- 913 9. Ypmawong MF, Dewalt PG, Johnson VH, Lamb JG, Semler BL. 1988. Protein 3cd Is the Major  
914 Poliovirus Proteinase Responsible for Cleavage of the P1 Capsid Precursor. *Virology* 166:265-  
915 270.
- 916 10. Toyoda H, Nicklin MJ, Murray MG, Anderson CW, Dunn JJ, Studier FW, Wimmer E. 1986. A  
917 second virus-encoded proteinase involved in proteolytic processing of poliovirus polyprotein.  
918 *Cell* 45:761-70.
- 919 11. Giachetti C, Semler BL. 1991. Role of a Viral Membrane Polypeptide in Strand-Specific Initiation  
920 of Poliovirus Rna-Synthesis. *Journal of Virology* 65:2647-2654.
- 921 12. Oh HS, Pathak HB, Goodfellow IG, Arnold JJ, Cameron CE. 2009. Insight into Poliovirus Genome  
922 Replication and Encapsidation Obtained from Studies of 3B-3C Cleavage Site Mutants. *Journal of*  
923 *Virology* 83:9370-9387.
- 924 13. Egger D, Teterina N, Ehrenfeld E, Bienz K. 2000. Formation of the poliovirus replication complex  
925 requires coupled viral translation, vesicle production, and viral RNA synthesis. *Journal of*  
926 *Virology* 74:6570-6580.
- 927 14. Cornell CT, Brunner JE, Semler BL. 2004. Differential rescue of poliovirus RNA replication  
928 functions by genetically modified RNA polymerase precursors. *Journal of Virology* 78:13007-  
929 13018.
- 930 15. Flather D, Semler BL. 2015. Picornaviruses and nuclear functions: targeting a cellular  
931 compartment distinct from the replication site of a positive-strand RNA virus. *Front Microbiol*  
932 6:594.
- 933 16. Baggen J, Thibaut HJ, Strating JRPM, van Kuppeveld FJM. 2018. The life cycle of non-polio  
934 enteroviruses and how to target it (vol 16, pg 368, 2018). *Nature Reviews Microbiology* 16:391-  
935 391.
- 936 17. Owino CO, Chu JH. 2019. Recent advances on the role of host factors during non-poliovirus  
937 enteroviral infections. *Journal of Biomedical Science* 26.
- 938 18. Park N, Skern T, Gustin KE. 2010. Specific Cleavage of the Nuclear Pore Complex Protein Nup62  
939 by a Viral Protease. *Journal of Biological Chemistry* 285:28796-28805.
- 940 19. Watters K, Inankur B, Gardiner JC, Warrick J, Sherer NM, Yin J, Palmenberg AC. 2017. Differential  
941 Disruption of Nucleocytoplasmic Trafficking Pathways by Rhinovirus 2A Proteases. *Journal of*  
942 *Virology* 91.

- 943 20. Gustin KE, Sarnow P. 2001. Effects of poliovirus infection on nucleo-cytoplasmic trafficking and  
944 nuclear pore complex composition. *Embo Journal* 20:240-249.
- 945 21. Belov GA, Lidsky PV, Mikitas OV, Egger D, Lukyanov KA, Bienz K, Agol VI. 2004. Bidirectional  
946 increase in permeability of nuclear envelope upon poliovirus infection and accompanying  
947 alterations of nuclear pores. *Journal of Virology* 78:10166-10177.
- 948 22. Maciejewski S, Nguyen JH, Gomez-Herreros F, Cortes-Ledesma F, Caldecott KW, Semler BL.  
949 2015. Divergent Requirement for a DNA Repair Enzyme during Enterovirus Infections. *mBio*  
950 7:e01931-15.
- 951 23. Virgen-Slane R, Rozovics JM, Fitzgerald KD, Ngo T, Chou W, van Noort GJV, Filippov DV, Gershon  
952 PD, Semler BL. 2012. An RNA virus hijacks an incognito function of a DNA repair enzyme.  
953 *Proceedings of the National Academy of Sciences of the United States of America* 109:14634-  
954 14639.
- 955 24. Hellen CUT, Witherell GW, Schmid M, Shin SH, Pestova TV, Gil A, Wimmer E. 1993. A  
956 Cytoplasmic 57-Kda Protein That Is Required for Translation of Picornavirus Rna by Internal  
957 Ribosomal Entry Is Identical to the Nuclear Pyrimidine Tract-Binding Protein. *Proceedings of the*  
958 *National Academy of Sciences of the United States of America* 90:7642-7646.
- 959 25. Walter BL, Parsley TB, Ehrenfeld E, Semler BL. 2002. Distinct poly(rC) binding protein KH domain  
960 determinants for poliovirus translation initiation and viral RNA replication. *Journal of Virology*  
961 76:12008-12022.
- 962 26. Brunner JE, Nguyen JHC, Roehl HH, Ho TV, Swiderek KM, Semler BL. 2005. Functional interaction  
963 of heterogeneous nuclear ribonucleoprotein C with poliovirus RNA synthesis initiation  
964 complexes. *Journal of Virology* 79:3254-3266.
- 965 27. Flather D, Nguyen JHC, Semler BL, Gershon PD. 2018. Exploitation of nuclear functions by human  
966 rhinovirus, a cytoplasmic RNA virus. *Plos Pathogens* 14.
- 967 28. Flather D, Semler BL. 2015. Picornaviruses and nuclear functions: targeting a cellular  
968 compartment distinct from the replication site of a positive-strand RNA virus. *Frontiers in*  
969 *Microbiology* 6.
- 970 29. Holmes AC, Zagnoli-Vieira G, Caldecott KW, Semler BL. 2020. Effects of TDP2/VPg Unlinkase  
971 Activity on Picornavirus Infections Downstream of Virus Translation. *Viruses-Basel* 12.
- 972 30. Langereis MA, Feng Q, Nelissen FHT, Virgen-Slane R, van Noort GJV, Maciejewski S, Filippov DV,  
973 Semler BL, van Delft FL, van Kuppeveld FJM. 2014. Modification of picornavirus genomic RNA  
974 using 'click' chemistry shows that unlinking of the VPg peptide is dispensable for translation and  
975 replication of the incoming viral RNA. *Nucleic Acids Research* 42:2473-2482.
- 976 31. Jahan N, Wimmer E, Mueller S. 2013. Polypyrimidine Tract Binding Protein-1 (PTB1) Is a  
977 Determinant of the Tissue and Host Tropism of a Human Rhinovirus/Poliovirus Chimera  
978 PV1(RIPO). *Plos One* 8.
- 979 32. Cheung PKM, Yuan J, Zhang HM, Chau D, Yanagawa B, Suarez A, McManus B, Yang DC. 2005.  
980 Specific interactions of mouse organ proteins with the 5'untranslated region of coxsackievirus  
981 B3: Potential determinants of viral tissue tropism. *Journal of Medical Virology* 77:414-424.
- 982 33. Viktorova EG, Nchoutmboube JA, Ford-Siltz LA, Iverson E, Belov GA. 2018. Phospholipid  
983 synthesis fueled by lipid droplets drives the structural development of poliovirus replication  
984 organelles. *Plos Pathogens* 14.
- 985 34. Laufman O, Perrino J, Andino R. 2019. Viral Generated Inter-Organelle Contacts Redirect Lipid  
986 Flux for Genome Replication. *Cell* 178:275-+.
- 987 35. Nchoutmboube JA, Viktorova EG, Scott AJ, Ford LA, Pei Z, Watkins PA, Ernst RK, Belov GA. 2013.  
988 Increased long chain acyl-Coa synthetase activity and fatty acid import is linked to membrane  
989 synthesis for development of picornavirus replication organelles. *PLoS Pathog* 9:e1003401.



- 990 36. Hsu NY, Ilnytska O, Belov G, Santiana M, Chen YH, Takvorian PM, Pau C, van der Schaar H,  
991 Kaushik-Basu N, Balla T, Cameron CE, Ehrenfeld E, van Kuppeveld FJM, Altan-Bonnet N. 2010.  
992 Viral Reorganization of the Secretory Pathway Generates Distinct Organelles for RNA  
993 Replication. *Cell* 141:799-811.
- 994 37. Bauer L, Ferla S, Head SA, Bhat S, Pasunooti KK, Shi WQ, Albulescu L, Liu JO, Brancale A, van  
995 Kuppeveld FJM, Strating J. 2018. Structure-activity relationship study of itraconazole, a broad-  
996 range inhibitor of picornavirus replication that targets oxysterol-binding protein (OSBP).  
997 *Antiviral Res* 156:55-63.
- 998 38. Albulescu L, Bigay J, Biswas B, Weber-Boyvat M, Dorobantu CM, Delang L, van der Schaar HM,  
999 Jung YS, Neyts J, Olkkonen VM, van Kuppeveld FJM, Strating J. 2017. Uncovering oxysterol-  
1000 binding protein (OSBP) as a target of the anti-enteroviral compound TTP-8307. *Antiviral Res*  
1001 140:37-44.
- 1002 39. Strating JR, van der Linden L, Albulescu L, Bigay J, Arita M, Delang L, Leyssen P, van der Schaar  
1003 HM, Lanke KH, Thibaut HJ, Ulferts R, Drin G, Schlinck N, Wubbolts RW, Sever N, Head SA, Liu JO,  
1004 Beachy PA, De Matteis MA, Shair MD, Olkkonen VM, Neyts J, van Kuppeveld FJ. 2015.  
1005 Itraconazole inhibits enterovirus replication by targeting the oxysterol-binding protein. *Cell Rep*  
1006 10:600-15.
- 1007 40. Roulin PS, Lotzerich M, Torta F, Tanner LB, van Kuppeveld FJ, Wenk MR, Greber UF. 2014.  
1008 Rhinovirus uses a phosphatidylinositol 4-phosphate/cholesterol counter-current for the  
1009 formation of replication compartments at the ER-Golgi interface. *Cell Host Microbe* 16:677-90.
- 1010 41. Siltz LAF, Viktorova EG, Zhang B, Kouivaskaia D, Dragunsky E, Chumakov K, Isaacs L, Belov GA.  
1011 2014. New Small-Molecule Inhibitors Effectively Blocking Picornavirus Replication. *Journal of*  
1012 *Virology* 88:11091-11107.
- 1013 42. Alastruey-Izquierdo A, Mellado E, Pelaez T, Peman J, Zapico S, Alvarez M, Rodriguez-Tudela JL,  
1014 Cuenca-Estrella M, Grp FS. 2013. Phosphatidylinositol 4-Kinase III Beta Is Essential for  
1015 Replication of Human Rhinovirus and Its Inhibition Causes a Lethal Phenotype In Vivo.  
1016 *Antimicrobial Agents and Chemotherapy* 57:3358-3368.
- 1017 43. Arita M, Kojima H, Nagano T, Okabe T, Wakita T, Shimizu H. 2013. Oxysterol-Binding Protein  
1018 Family I Is the Target of Minor Enviroxime-Like Compounds. *Journal of Virology* 87:4252-4260.
- 1019 44. Arita M, Kojima H, Nagano T, Okabe T, Wakita T, Shimizu H. 2011. Phosphatidylinositol 4-Kinase  
1020 III Beta Is a Target of Enviroxime-Like Compounds for Antipoliiovirus Activity. *Journal of Virology*  
1021 85:2364-2372.
- 1022 45. Arita M, Takebe Y, Wakita T, Shimizu H. 2010. A bifunctional anti-enterovirus compound that  
1023 inhibits replication and the early stage of enterovirus 71 infection. *Journal of General Virology*  
1024 91:2734-2744.
- 1025 46. Lanke KH, van der Schaar HM, Belov GA, Feng Q, Duijsings D, Jackson CL, Ehrenfeld E, van  
1026 Kuppeveld FJ. 2009. GBF1, a guanine nucleotide exchange factor for Arf, is crucial for  
1027 coxsackievirus B3 RNA replication. *J Virol* 83:11940-9.
- 1028 47. Belov GA, Feng Q, Nikovics K, Jackson CL, Ehrenfeld E. 2008. A Critical Role of a Cellular  
1029 Membrane Traffic Protein in Poliovirus RNA Replication. *Plos Pathogens* 4.
- 1030 48. Wessels E, Duijsings D, Niu TK, Neumann S, Oorschot VM, de Lange F, Lanke KHW, Klumperman  
1031 J, Henke A, Jackson CL, Melchers WJG, van Kuppeveld FJM. 2006. A viral protein that blocks  
1032 Arf1-mediated COP-I assembly by inhibiting the guanine nucleotide exchange factor GBF1.  
1033 *Developmental Cell* 11:191-201.
- 1034 49. Ilnytska O, Santiana M, Hsu NY, Du WL, Chen YH, Viktorova EG, Belov G, Brinker A, Storch J,  
1035 Moore C, Dixon JL, Altan-Bonnet N. 2013. Enteroviruses Harness the Cellular Endocytic  
1036 Machinery to Remodel the Host Cell Cholesterol Landscape for Effective Viral Replication. *Cell*  
1037 *Host & Microbe* 14:281-293.

- 1038 50. Lyoo H, van der Schaar HM, Dorobantu CM, Rabouw HH, Strating JRPM, van Kuppeveld FJM.  
1039 2019. ACBD3 Is an Essential Pan-enterovirus Host Factor That Mediates the Interaction between  
1040 Viral 3A Protein and Cellular Protein PI4KB. *Mbio* 10.
- 1041 51. Belov GA, Nair V, Hansen BT, Hoyt FH, Fischer ER, Ehrenfeld E. 2012. Complex Dynamic  
1042 Development of Poliovirus Membranous Replication Complexes. *Journal of Virology* 86:302-312.
- 1043 52. Limpens RWAL, van der Schaar HM, Kumar D, Koster AJ, Snijder EJ, van Kuppeveld FJM, Barcena  
1044 M. 2011. The Transformation of Enterovirus Replication Structures: a Three-Dimensional Study  
1045 of Single- and Double-Membrane Compartments. *Mbio* 2.
- 1046 53. Kaczmarek B, Verbavatz JM, Jackson CL. 2017. GBF1 and Arf1 function in vesicular trafficking,  
1047 lipid homeostasis and organelle dynamics. *Biology of the Cell* 109:391-399.
- 1048 54. Viktorova EG, Gabaglio S, Meissner JM, Lee E, Moghimi S, Sztul E, Belov GA. 2019. A Redundant  
1049 Mechanism of Recruitment Underlies the Remarkable Plasticity of the Requirement of Poliovirus  
1050 Replication for the Cellular ArfGEF GBF1. *Journal of Virology* 93.
- 1051 55. Belov GA, Kovtunovych G, Jackson CL, Ehrenfeld E. 2010. Poliovirus replication requires the N-  
1052 terminus but not the catalytic Sec7 domain of ArfGEF GBF1. *Cellular Microbiology* 12:1463-1479.
- 1053 56. Lam SS, Martell JD, Kamer KJ, Deerinck TJ, Ellisman MH, Mootha VK, Ting AY. 2015. Directed  
1054 evolution of APEX2 for electron microscopy and proximity labeling. *Nature Methods* 12:51-54.
- 1055 57. Hung V, Udeshi ND, Lam SS, Loh KH, Cox KJ, Pedram K, Carr SA, Ting AY. 2016. Spatially resolved  
1056 proteomic mapping in living cells with the engineered peroxidase APEX2. *Nature Protocols*  
1057 11:456-475.
- 1058 58. Tran JR, Paulson DI, Moresco JJ, Adam SA, Yates JR, Goldman RD, Zheng Y. 2021. An APEX2  
1059 proximity ligation method for mapping interactions with the nuclear lamina. *J Cell Biol* 220.
- 1060 59. Kärber G. 1931. Beitrag zur kollektiven Behandlung pharmakologischer Reihenversuche. . *Archiv  
1061 f experiment Pathol u Pharmakol*:480-483.
- 1062 60. Viktorova EG, Khatyar S, Samal S, Belov GA. 2018. Poliovirus Replicon RNA Generation,  
1063 Transfection, Packaging, and Quantitation of Replication. *Curr Protoc Microbiol* 48:15H 4 1-15H  
1064 4 15.
- 1065 61. Lanke KHW, van der Schaar HM, Belov GA, Feng Q, Duijsings D, Jackson CL, Ehrenfeld E, van  
1066 Kuppeveld FJM. 2009. GBF1, a Guanine Nucleotide Exchange Factor for Arf, Is Crucial for  
1067 Coxsackievirus B3 RNA Replication. *Journal of Virology* 83:11940-11949.
- 1068 62. Pasamontes L, Egger D, Bienz K. 1986. Production of Monoclonal and Monospecific Antibodies  
1069 against Non-Capsid Proteins of Poliovirus. *Journal of General Virology* 67:2415-2422.
- 1070 63. Egger D, Pasamontes L, Bolten R, Boyko V, Bienz K. 1996. Reversible dissociation of the  
1071 poliovirus replication complex: Functions and interactions of its components in viral RNA  
1072 synthesis. *Journal of Virology* 70:8675-8683.
- 1073 64. Doedens JR, Giddings TH, Kirkegaard K. 1997. Inhibition of endoplasmic reticulum-to-Golgi traffic  
1074 by poliovirus protein 3A: Genetic and ultrastructural analysis. *Journal of Virology* 71:9054-9064.
- 1075 65. Zhang CS, Hawley SA, Zong Y, Li MQ, Wang ZC, Gray A, Ma T, Cui JW, Feng JW, Zhu MJ, Wu YQ, Li  
1076 TY, Ye ZY, Lin SY, Yin HY, Piao HL, Hardie DGR, Lin SC. 2017. Fructose-1,6-bisphosphate and  
1077 aldolase mediate glucose sensing by AMPK. *Nature* 548:112-+.
- 1078 66. Ahmed NS, Harrell LM, Wieland DR, Lay MA, Thompson VF, Schwartz JC. 2021. Fusion protein  
1079 EWS-FLI1 is incorporated into a protein granule in cells. *Rna* 27:920-932.
- 1080 67. Fei T, Chen YW, Xiao TF, Li W, Cato L, Zhang P, Cotter MB, Bowden M, Lis RT, Zhao SG, Wu Q,  
1081 Feng FY, Loda M, He HSH, Liu XS, Brown M. 2017. Genome-wide CRISPR screen identifies  
1082 HNRNPL as a prostate cancer dependency regulating RNA splicing. *Proceedings of the National  
1083 Academy of Sciences of the United States of America* 114:E5207-E5215.

- 1084 68. Fox JT, Shin WK, Caudill MA, Stover PJ. 2009. A UV-responsive Internal Ribosome Entry Site  
1085 Enhances Serine Hydroxymethyltransferase 1 Expression for DNA Damage Repair. *Journal of*  
1086 *Biological Chemistry* 284:31097-31108.
- 1087 69. Li L, Yin JY, He FZ, Huang MS, Zhu T, Gao YF, Chen YX, Zhou DB, Chen X, Sun LQ, Zhang W, Zhou  
1088 HH, Liu ZQ. 2017. Long noncoding RNA SFTA1P promoted apoptosis and increased  
1089 cisplatin chemosensitivity via regulating the hnRNP-U-GADD45A axis in lung squamous cell  
1090 carcinoma. *Oncotarget* 8:97476-97489.
- 1091 70. Nakamura N, Yamauchi T, Hiramoto M, Yuri M, Naito M, Takeuchi M, Yamanaka K, Kita A,  
1092 Nakahara T, Kinoyama I, Matsuhisa A, Kaneko N, Koutoku H, Sasamata M, Yokota H, Kawabata S,  
1093 Furuichi K. 2012. Interleukin Enhancer-binding Factor 3/NF110 Is a Target of YM155, a  
1094 Suppressant of Survivin. *Molecular & Cellular Proteomics* 11.
- 1095 71. Cao D, Haussecker D, Huang Y, Kay MA. 2009. Combined proteomic-RNAi screen for host factors  
1096 involved in human hepatitis delta virus replication. *RNA* 15:1971-9.
- 1097 72. Jin L, Chun J, Pan C, Alesi GN, Li D, Magliocca KR, Kang Y, Chen ZG, Shin DM, Khuri FR, Fan J, Kang  
1098 S. 2017. Phosphorylation-mediated activation of LDHA promotes cancer cell invasion and  
1099 tumour metastasis. *Oncogene* 36:3797-3806.
- 1100 73. McClelland ML, Adler AS, Shang YL, Hunsaker T, Truong T, Peterson D, Torres E, Li L, Haley B,  
1101 Stephan JP, Belvin M, Hatzivassiliou G, Blackwood EM, Corson L, Evangelista M, Zha JP, Firestein  
1102 R. 2012. An Integrated Genomic Screen Identifies LDHB as an Essential Gene for Triple-Negative  
1103 Breast Cancer. *Cancer Research* 72:5812-5823.
- 1104 74. Matsunaga S, Takata H, Morimoto A, Hayashihara K, Higashi T, Akatsuchi K, Mizusawa E,  
1105 Yamakawa M, Ashida M, Matsunaga TM, Azuma T, Uchiyama S, Fukui K. 2012. RBMX: A  
1106 Regulator for Maintenance and Centromeric Protection of Sister Chromatid Cohesion. *Cell*  
1107 *Reports* 1:299-308.
- 1108 75. Kall L, Storey JD, Noble WS. 2008. Non-parametric estimation of posterior error probabilities  
1109 associated with peptides identified by tandem mass spectrometry. *Bioinformatics* 24:l42-l48.
- 1110 76. Mi HY, Ebert D, Muruganujan A, Mills C, Albu LP, Mushayamaha T, Thomas PD. 2021. PANTHER  
1111 version 16: a revised family classification, tree-based classification tool, enhancer regions and  
1112 extensive API. *Nucleic Acids Research* 49:D394-D403.
- 1113 77. Jackson CL, Casanova JE. 2000. Turning on ARF: the Sec7 family of guanine-nucleotide-exchange  
1114 factors. *Trends in Cell Biology* 10:60-67.
- 1115 78. Bhatt JM, Hancock W, Meissner JM, Kaczmarczyk A, Lee E, Viktorova E, Ramanadham S, Belov  
1116 GA, Sztul E. 2019. Promiscuity of the catalytic Sec7 domain within the guanine nucleotide  
1117 exchange factor GBF1 in ARF activation, Golgi homeostasis, and effector recruitment. *Molecular*  
1118 *Biology of the Cell* 30:1523-1535.
- 1119 79. Pocognoni CA, Viktorova EG, Wright J, Meissner JM, Sager G, Lee E, Belov GA, Sztul E. 2018.  
1120 Highly conserved motifs within the large Sec7 ARF guanine nucleotide exchange factor GBF1  
1121 target it to the Golgi and are critical for GBF1 activity. *American Journal of Physiology-Cell*  
1122 *Physiology* 314:C675-C689.
- 1123 80. Wright J, Kahn RA, Sztul E. 2014. Regulating the large Sec7 ARF guanine nucleotide exchange  
1124 factors: the when, where and how of activation. *Cellular and Molecular Life Sciences* 71:3419-  
1125 3438.
- 1126 81. Olson MG, Widner RE, Jorgenson LM, Lawrence A, Lagundzin D, Woods NT, Ouellette SP, Rucks  
1127 EA. 2019. Proximity Labeling To Map Host-Pathogen Interactions at the Membrane of a  
1128 Bacterium-Containing Vacuole in *Chlamydia trachomatis*-Infected Human Cells. *Infection and*  
1129 *Immunity* 87.

- 1130 82. Belov GA, Altan-Bonnet N, Kovtunovych G, Jackson CL, Lippincott-Schwartz J, Ehrenfeld E. 2007.  
1131 Hijacking components of the cellular secretory pathway for replication of poliovirus RNA. *Journal*  
1132 *of Virology* 81:558-567.
- 1133 83. Moghimi S, Viktorova E, Zimina A, Szul T, Sztul E, Belov GA. 2021. Enterovirus Infection Induces  
1134 Massive Recruitment of All Isoforms of Small Cellular Arf GTPases to the Replication Organelles.  
1135 *Journal of Virology* 95.
- 1136 84. Oughtred R, Rust J, Chang C, Breitkreutz BJ, Stark C, Willems A, Boucher L, Leung G, Kolas N,  
1137 Zhang F, Dolma S, Coulombe-Huntington J, Chatr-aryamontri A, Dolinski K, Tyers M. 2021. The  
1138 BioGRID database: A comprehensive biomedical resource of curated protein, genetic, and  
1139 chemical interactions. *Protein Science* 30:187-200.
- 1140 85. Stark C, Breitkreutz BJ, Reguly T, Boucher L, Breitkreutz A, Tyers M. 2006. BioGRID: a general  
1141 repository for interaction datasets. *Nucleic Acids Research* 34:D535-D539.
- 1142 86. McBride AE, Schlegel A, Kirkegaard K. 1996. Human protein Sam68 relocalization and interaction  
1143 with poliovirus RNA polymerase in infected cells. *Proceedings of the National Academy of*  
1144 *Sciences of the United States of America* 93:2296-2301.
- 1145 87. Herold J, Andino R. 2001. Poliovirus RNA replication requires genome circularization through a  
1146 protein-protein bridge. *Molecular Cell* 7:581-591.
- 1147 88. Toyoda H, Franco D, Fujita K, Paul AV, Wimmer E. 2007. Replication of poliovirus requires  
1148 binding of the poly(rC) binding protein to the cloverleaf as well as to the adjacent C-rich spacer  
1149 sequence between the cloverleaf and the internal ribosomal entry site. *Journal of Virology*  
1150 81:10017-10028.
- 1151 89. Blyn LB, Towner JS, Semler BL, Ehrenfeld E. 1997. Requirement of Poly(rC) binding protein 2 for  
1152 translation of poliovirus RNA. *Journal of Virology* 71:6243-6246.
- 1153 90. Parsley TB, Towner JS, Blyn LB, Ehrenfeld E, Semler BL. 1997. Poly (rC) binding protein 2 forms a  
1154 ternary complex with the 5'-terminal sequences of poliovirus RNA and the viral 3CD proteinase.  
1155 *Rna* 3:1124-1134.
- 1156 91. Kafasla P, Lin H, Curry S, Jackson RJ. 2011. Activation of picornaviral IRESs by PTB shows  
1157 differential dependence on each PTB RNA-binding domain. *Rna* 17:1120-1131.
- 1158 92. Kafasla P, Morgner N, Robinson CV, Jackson RJ. 2010. Polypyrimidine tract-binding protein  
1159 stimulates the poliovirus IRES by modulating eIF4G binding. *Embo Journal* 29:3710-3722.
- 1160 93. Pedley AM, Benkovic SJ. 2017. A New View into the Regulation of Purine Metabolism: The  
1161 Purinosome. *Trends in Biochemical Sciences* 42:141-154.
- 1162 94. Wang YJ, Wang WS, Xu L, Zhou XY, Shokrollahi E, Felczak K, van der Laan LJW, Pankiewicz KW,  
1163 Sprengers D, Raat NJH, Metselaar HJ, Peppelenbosch MP, Pan QW. 2016. Cross Talk between  
1164 Nucleotide Synthesis Pathways with Cellular Immunity in Constraining Hepatitis E Virus  
1165 Replication. *Antimicrobial Agents and Chemotherapy* 60:2834-2848.
- 1166 95. Ariav Y, Ch'ng JH, Christofk HR, Ron-Harel N, Erez A. 2021. Targeting nucleotide metabolism as  
1167 the nexus of viral infections, cancer, and the immune response. *Science Advances* 7.
- 1168 96. Lenarcic EM, Landry DM, Greco TM, Cristea IM, Thompson SR. 2013. Thiouracil Cross-Linking  
1169 Mass Spectrometry: a Cell-Based Method To Identify Host Factors Involved in Viral  
1170 Amplification. *Journal of Virology* 87:8697-8712.
- 1171 97. Watson SF, Bellora N, Macias S. 2020. ILF3 contributes to the establishment of the antiviral type  
1172 I interferon program. *Nucleic Acids Research* 48:116-129.
- 1173 98. Li X, Liu CX, Xue W, Zhang Y, Jiang S, Yin QF, Wei J, Yao RW, Yang L, Chen LL. 2017. Coordinated  
1174 circRNA Biogenesis and Function with NF90/NF110 in Viral Infection. *Molecular Cell* 67:214-+.
- 1175 99. Gomila RC, Martin GW, Gehrke L. 2011. NF90 Binds the Dengue Virus RNA 3' Terminus and Is a  
1176 Positive Regulator of Dengue Virus Replication. *Plos One* 6.

- 1177 100. Isken O, Baroth M, Grassmann CW, Weinlich S, Ostareck DH, Ostareck-Lederer A, Behrens SE.  
1178 2007. Nuclear factors are involved in hepatitis C virus RNA replication. *Rna* 13:1675-1692.
- 1179 101. Reichman TW, Muniz LC, Mathews MB. 2002. The RNA binding protein nuclear factor 90  
1180 functions as both a positive and negative regulator of gene expression in mammalian cells.  
1181 *Molecular and Cellular Biology* 22:343-356.
- 1182 102. Patino C, Haenni AL, Urcuqui-Inchima S. 2015. NF90 isoforms, a new family of cellular proteins  
1183 involved in viral replication? *Biochimie* 108:20-24.
- 1184 103. Merrill MK, Gromeier M. 2006. The double-stranded RNA binding protein 76 : NF45 heterodimer  
1185 inhibits translation initiation at the rhinovirus type 2 internal ribosome entry site. *Journal of*  
1186 *Virology* 80:6936-6942.
- 1187 104. Mamczur P, Gamian A, Kolodziej J, Dziegiel P, Rakus D. 2013. Nuclear localization of aldolase A  
1188 correlates with cell proliferation. *Biochimica Et Biophysica Acta-Molecular Cell Research*  
1189 1833:2812-2822.
- 1190 105. Dougherty JD, Tsai WC, Lloyd RE. 2015. Multiple Poliovirus Proteins Repress Cytoplasmic RNA  
1191 Granules. *Viruses-Basel* 7:6127-6140.
- 1192 106. Farhat R, Ankavay M, Lebsir N, Gouttenoire J, Jackson CL, Wychowski C, Moradpour D,  
1193 Dubuisson J, Rouille Y, Cocquerel L. 2018. Identification of GBF1 as a cellular factor required for  
1194 hepatitis E virus RNA replication. *Cellular Microbiology* 20.
- 1195 107. Verheije MH, Raaben M, Mari M, Lintelo EGT, Reggiori F, van Kuppeveld FJM, Rottier PJM, de  
1196 Haan CAM. 2008. Mouse hepatitis coronavirus RNA replication depends on GBF1-mediated  
1197 ARF1 activation. *Plos Pathogens* 4.
- 1198 108. Goueslain L, Alsaleh K, Horellou P, Roingard P, Descamps V, Duverlie G, Ciczora Y, Wychowski C,  
1199 Dubuisson J, Rouille Y. 2010. Identification of GBF1 as a Cellular Factor Required for Hepatitis C  
1200 Virus RNA Replication. *Journal of Virology* 84:773-787.
- 1201 109. Rhee HW, Zou P, Udeshi ND, Martell JD, Mootha VK, Carr SA, Ting AY. 2013. Proteomic Mapping  
1202 of Mitochondria in Living Cells via Spatially Restricted Enzymatic Tagging. *Science* 339:1328-  
1203 1331.
- 1204 110. Coyne CB, Bozym R, Morosky SA, Hanna SL, Mukherjee A, Tudor M, Kim KS, Cherry S. 2011.  
1205 Comparative RNAi Screening Reveals Host Factors Involved in Enterovirus Infection of Polarized  
1206 Endothelial Monolayers. *Cell Host & Microbe* 9:70-82.
- 1207 111. van der Sanden SMG, Wu WL, Dybdahl-Sissoko N, Weldon WC, Brooks P, O'Donnell J, Jones LP,  
1208 Brown C, Tompkins SM, Oberste MS, Karpilow J, Tripp RA. 2016. Engineering Enhanced Vaccine  
1209 Cell Lines To Eradicate Vaccine-Preventable Diseases: the Polio End Game. *Journal of Virology*  
1210 90:1694-1704.
- 1211 112. Wu KX, Phuektes P, Kumar P, Goh GYL, Moreau D, Chow VTK, Bard F, Chu JJH. 2016. Human  
1212 genome-wide RNAi screen reveals host factors required for enterovirus 71 replication. *Nature*  
1213 *Communications* 7.
- 1214 113. Giansanti P, Strating JRPM, Defourny KAY, Cesonyte I, Bottino AMS, Post H, Viktorova EG, Ho  
1215 VQT, Langereis MA, Belov GA, Nolte-t Hoen ENM, Heck AJR, van Kuppeveld FJM. 2020. Dynamic  
1216 remodelling of the human host cell proteome and phosphoproteome upon enterovirus  
1217 infection. *Nature Communications* 11.
- 1218 114. Saeed M, Kapell S, Hertz NT, Wu XF, Bell K, Ashbrook AW, Mark MT, Zebroski HA, Neal ML,  
1219 Flodstrom-Tullberg M, MacDonald MR, Aitchison JD, Molina H, Rice CM. 2020. Defining the  
1220 proteolytic landscape during enterovirus infection. *Plos Pathogens* 16.
- 1221 115. Das P, Dudley JP. 2021. How Viruses Use the VCP/p97 ATPase Molecular Machine. *Viruses-Basel*  
1222 13.
- 1223 116. Teterina NL, Zhou WD, Cho MW, Ehrenfeld E. 1995. Inefficient Complementation Activity of  
1224 Poliovirus 2c and 3d Proteins for Rescue of Lethal Mutations. *Journal of Virology* 69:4245-4254.

- 1225 117. Towner JS, Mazanet MM, Semler BL. 1998. Rescue of defective poliovirus RNA replication by  
1226 3AB-containing precursor polyproteins. *Journal of Virology* 72:7191-7200.
- 1227 118. Pathak HB, Oh HS, Goodfellow IG, Arnold JJ, Cameron CE. 2008. Picornavirus genome  
1228 replication: roles of precursor proteins and rate-limiting steps in oril-dependent VPg  
1229 uridylylation. *J Biol Chem* 283:30677-88.
- 1230 119. Nie ZZ, Hirsch DS, Randazzo PA. 2003. Arf and its many interactors. *Current Opinion in Cell  
1231 Biology* 15:396-404.
- 1232 120. Jackson CL. 2014. Arf Proteins and Their Regulators: At the Interface Between Membrane Lipids  
1233 and the Protein Trafficking Machinery. . In A. W (ed), *Ras Superfamily Small G Proteins: Biology  
1234 and Mechanisms 2* doi:10.1007/978-3-319-07761-1\_8. Springer, Cham.
- 1235 121. Cohen LA, Honda A, Varnai P, Brown FD, Balla T, Donaldson JG. 2007. Active Arf6 recruits  
1236 ARNO/cytohesin GEFs to the PM by binding their PH domain. *Molecular Biology of the Cell*  
1237 18:2244-2253.
- 1238 122. Li HS, Shome K, Rojas R, Rizzo MA, Vasudevan C, Fluharty E, Santy LC, Casanova JE, Romero G.  
1239 2003. The Guanine Nucleotide Exchange Factor ARNO mediates the activation of ARF and  
1240 phospholipase D by insulin. *Bmc Cell Biology* 4:1-10.
- 1241 123. Prasanth KR, Chuang CK, Nagy PD. 2017. Co-opting ATP-generating glycolytic enzyme PGK1  
1242 phosphoglycerate kinase facilitates the assembly of viral replicase complexes. *Plos Pathogens*  
1243 13.
- 1244 124. Chuang CK, Prasanth KR, Nagy PD. 2017. The Glycolytic Pyruvate Kinase Is Recruited Directly into  
1245 the Viral Replicase Complex to Generate ATP for RNA Synthesis. *Cell Host & Microbe* 22:639-+.
- 1246 125. Lin WW, Liu YY, Molho M, Zhang SJ, Wang LS, Xie LH, Nagy PD. 2019. Co-opting the fermentation  
1247 pathway for tombusvirus replication: Compartmentalization of cellular metabolic pathways for  
1248 rapid ATP generation. *Plos Pathogens* 15.
- 1249 126. Tien CF, Cheng SC, Ho YP, Chen YS, Hsu JH, Chang RY. 2014. Inhibition of aldolase A blocks  
1250 biogenesis of ATP and attenuates Japanese encephalitis virus production. *Biochemical and  
1251 Biophysical Research Communications* 443:464-469.
- 1252 127. Chang YC, Yang YC, Tien CP, Yang CJ, Hsiao M. 2018. Roles of Aldolase Family Genes in Human  
1253 Cancers and Diseases. *Trends in Endocrinology and Metabolism* 29:549-559.
- 1254 128. Koonin EV, Agol VI. 1984. Encephalomyocarditis Virus-Replication Complexes Preferentially  
1255 Utilizing Nucleoside Diphosphates as Substrates for Viral-Rna Synthesis - Nucleotide Kinases  
1256 Specifically Associated with the Complex Channel Rna Precursor. *European Journal of  
1257 Biochemistry* 144:249-254.
- 1258 129. Lee J, Nguyen PT, Shim HS, Hyeon SJ, Im H, Choi MH, Chung S, Kowall NW, Lee SB, Ryu H. 2019.  
1259 EWSR1, a multifunctional protein, regulates cellular function and aging via genetic and  
1260 epigenetic pathways. *Biochimica Et Biophysica Acta-Molecular Basis of Disease* 1865:1938-1945.
- 1261 130. Castella S, Bernard R, Corno M, Fradin A, Larcher JC. 2015. If3 and NF90 functions in RNA  
1262 biology. *Wiley Interdisciplinary Reviews-Rna* 6:243-256.
- 1263 131. Kundu P, Raychaudhuri S, Tsai W, Dasgupta A. 2005. Shutoff of RNA polymerase II transcription  
1264 by poliovirus involves 3C protease-mediated cleavage of the TATA-binding protein at an  
1265 alternative site: Incomplete shutoff of transcription interferes with efficient viral replication.  
1266 *Journal of Virology* 79:9702-9713.
- 1267 132. Sharma R, Raychaudhuri S, Dasgupta A. 2004. Nuclear entry of poliovirus protease-polymerase  
1268 precursor 3CD: implications for host cell transcription shut-off. *Virology* 320:195-205.

1269

1270

1271

1272

1273

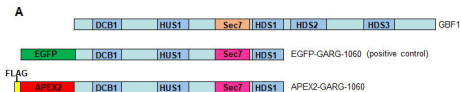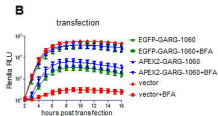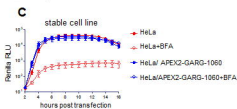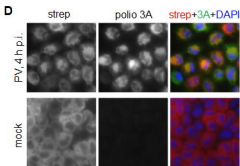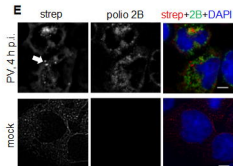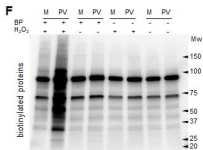



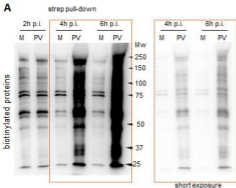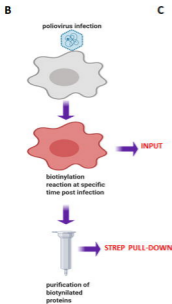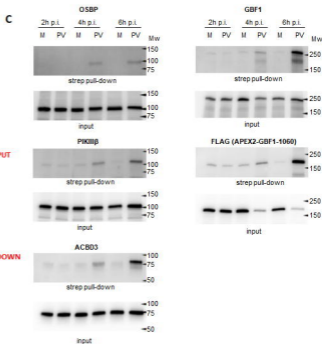



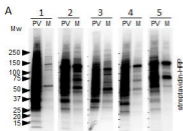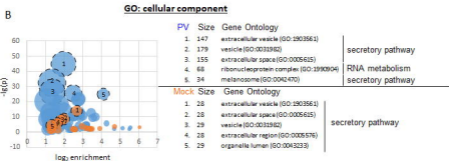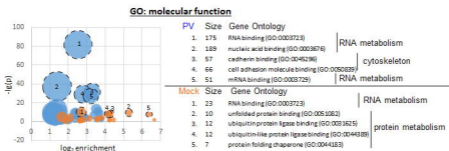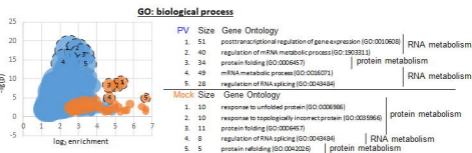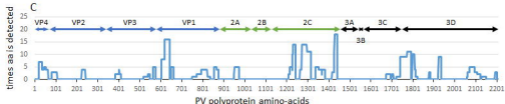

**A****polio replicon**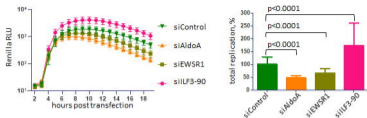**viability (ATP)**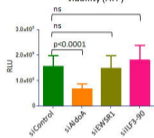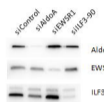**B****kinetics**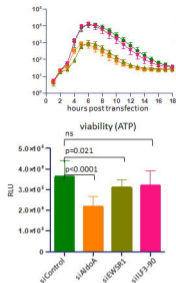**CVB3 replicon****viability (ATP)**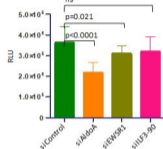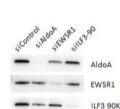**C****poliovirus infection**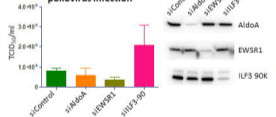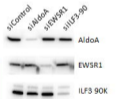**CVB3 infection**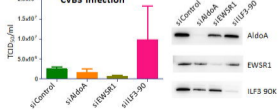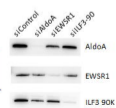**D****viability (ATP)**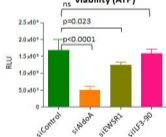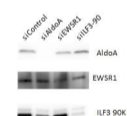**viability (Mit)**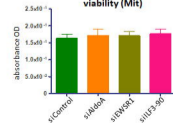

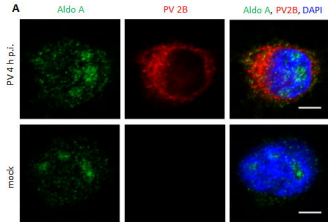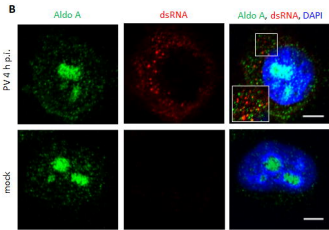

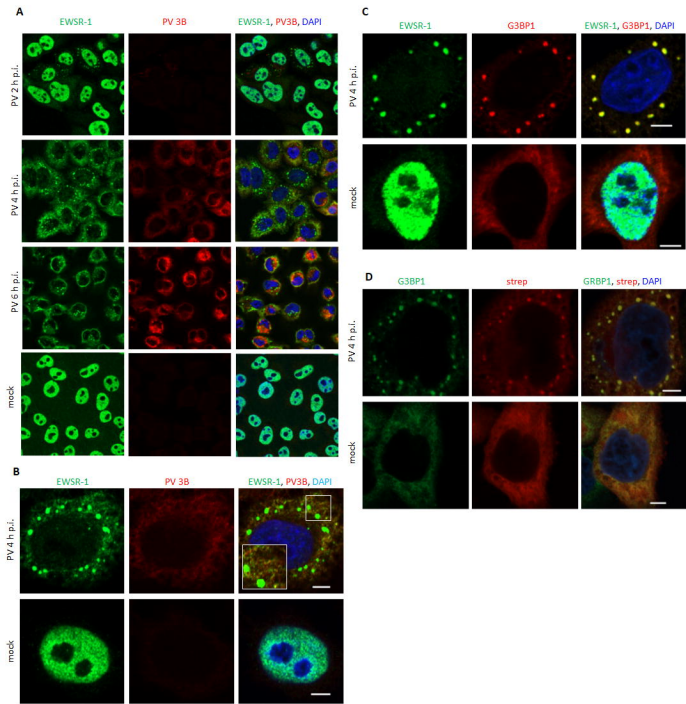

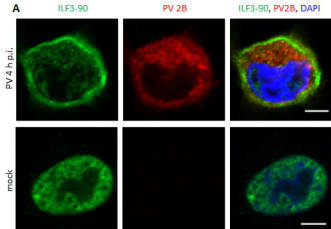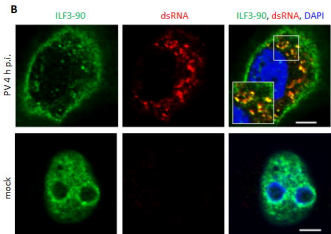

Source: https://www.biorxiv.org/content/10.1101/2022.05.24.493328v1.full.pdf
